# Supplementary material for: Mitochondrial protein carboxyl-terminal alanine-threonine tailing promotes human glioblastoma growth by regulating mitochondrial function
Source: eLife journal article supplement (doi:10.7554/elife.99438), 2024-09-02
Supplement: fig1-data1 [file Figure 1-source data 1.pdf › Figure 1-source data 1.pdf]

Figure 1B

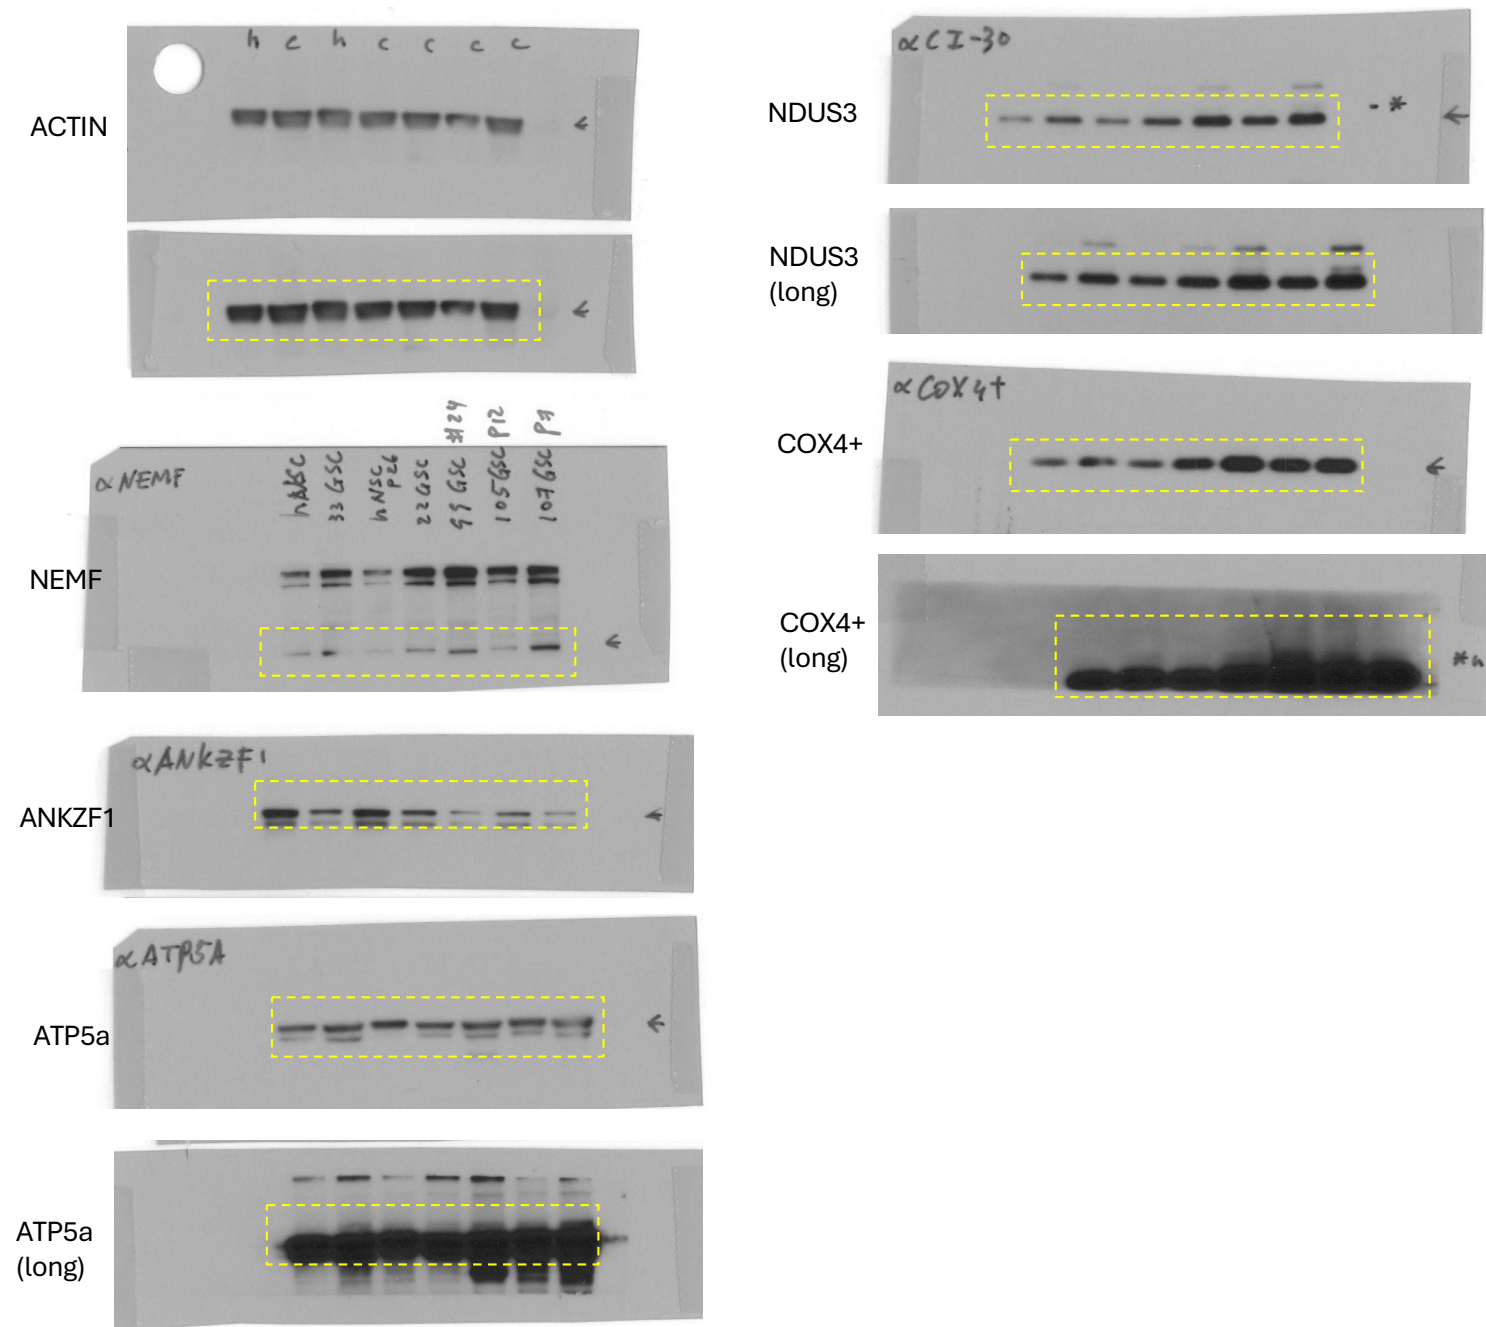

**Figure 1, source data 1**  
Original membranes corresponding to Figure 1B. The sample labels are indicated above the NEMF blot.

Figure 1C

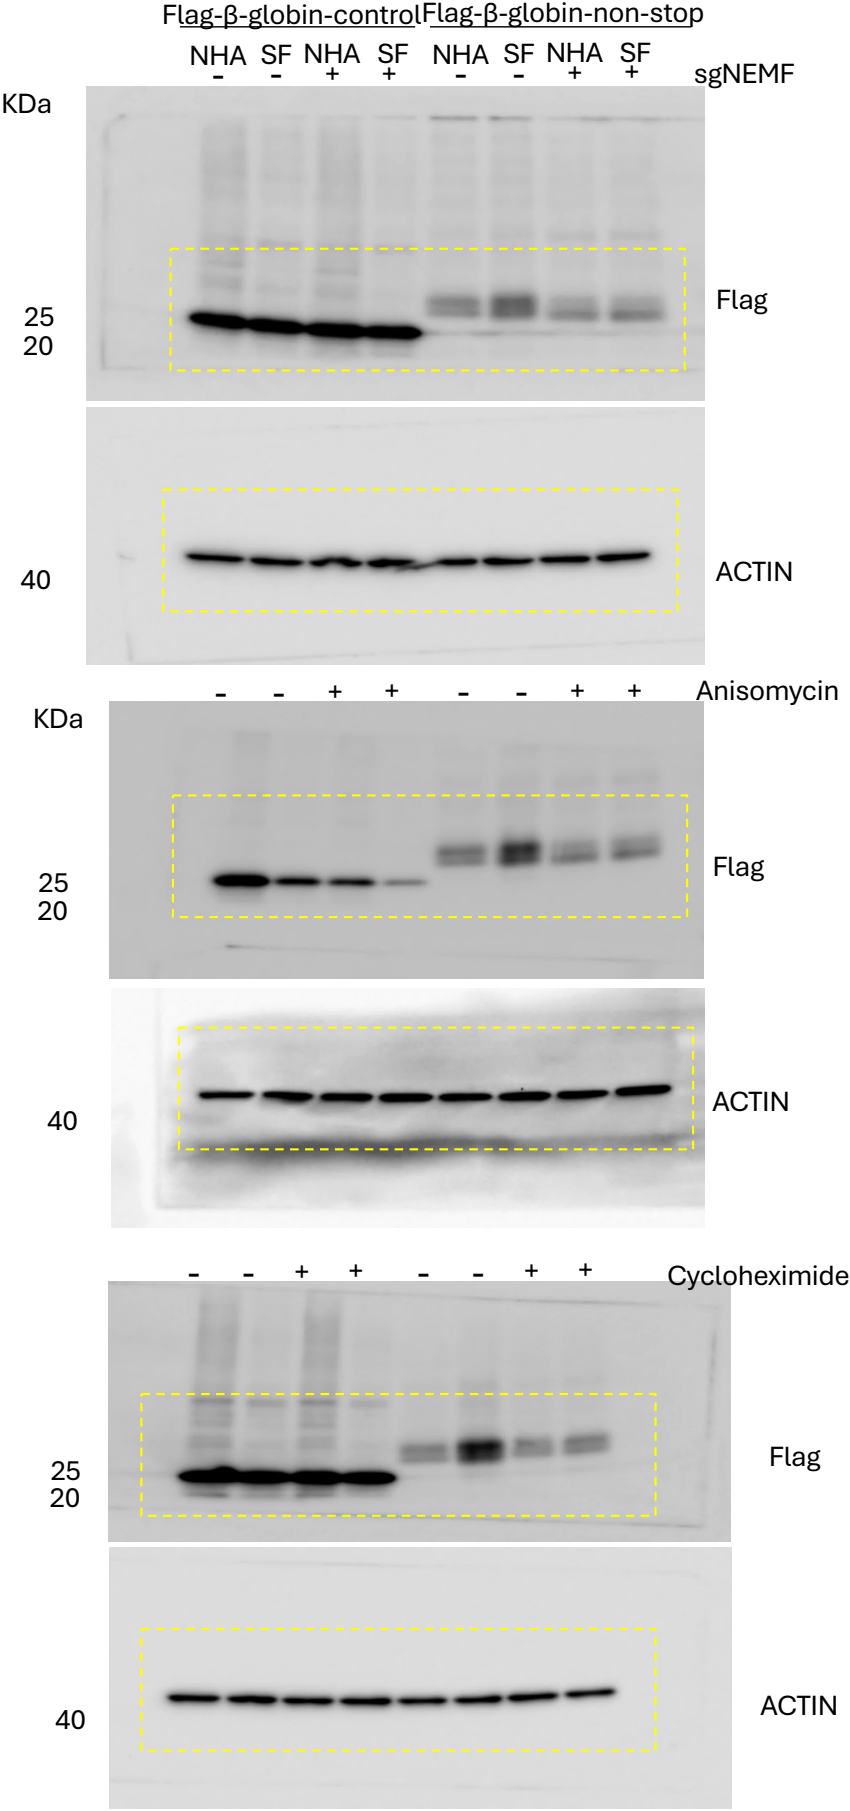

Figure 1, source data 1  
Original membranes corresponding to Figure 1C.

**Figure 1D**

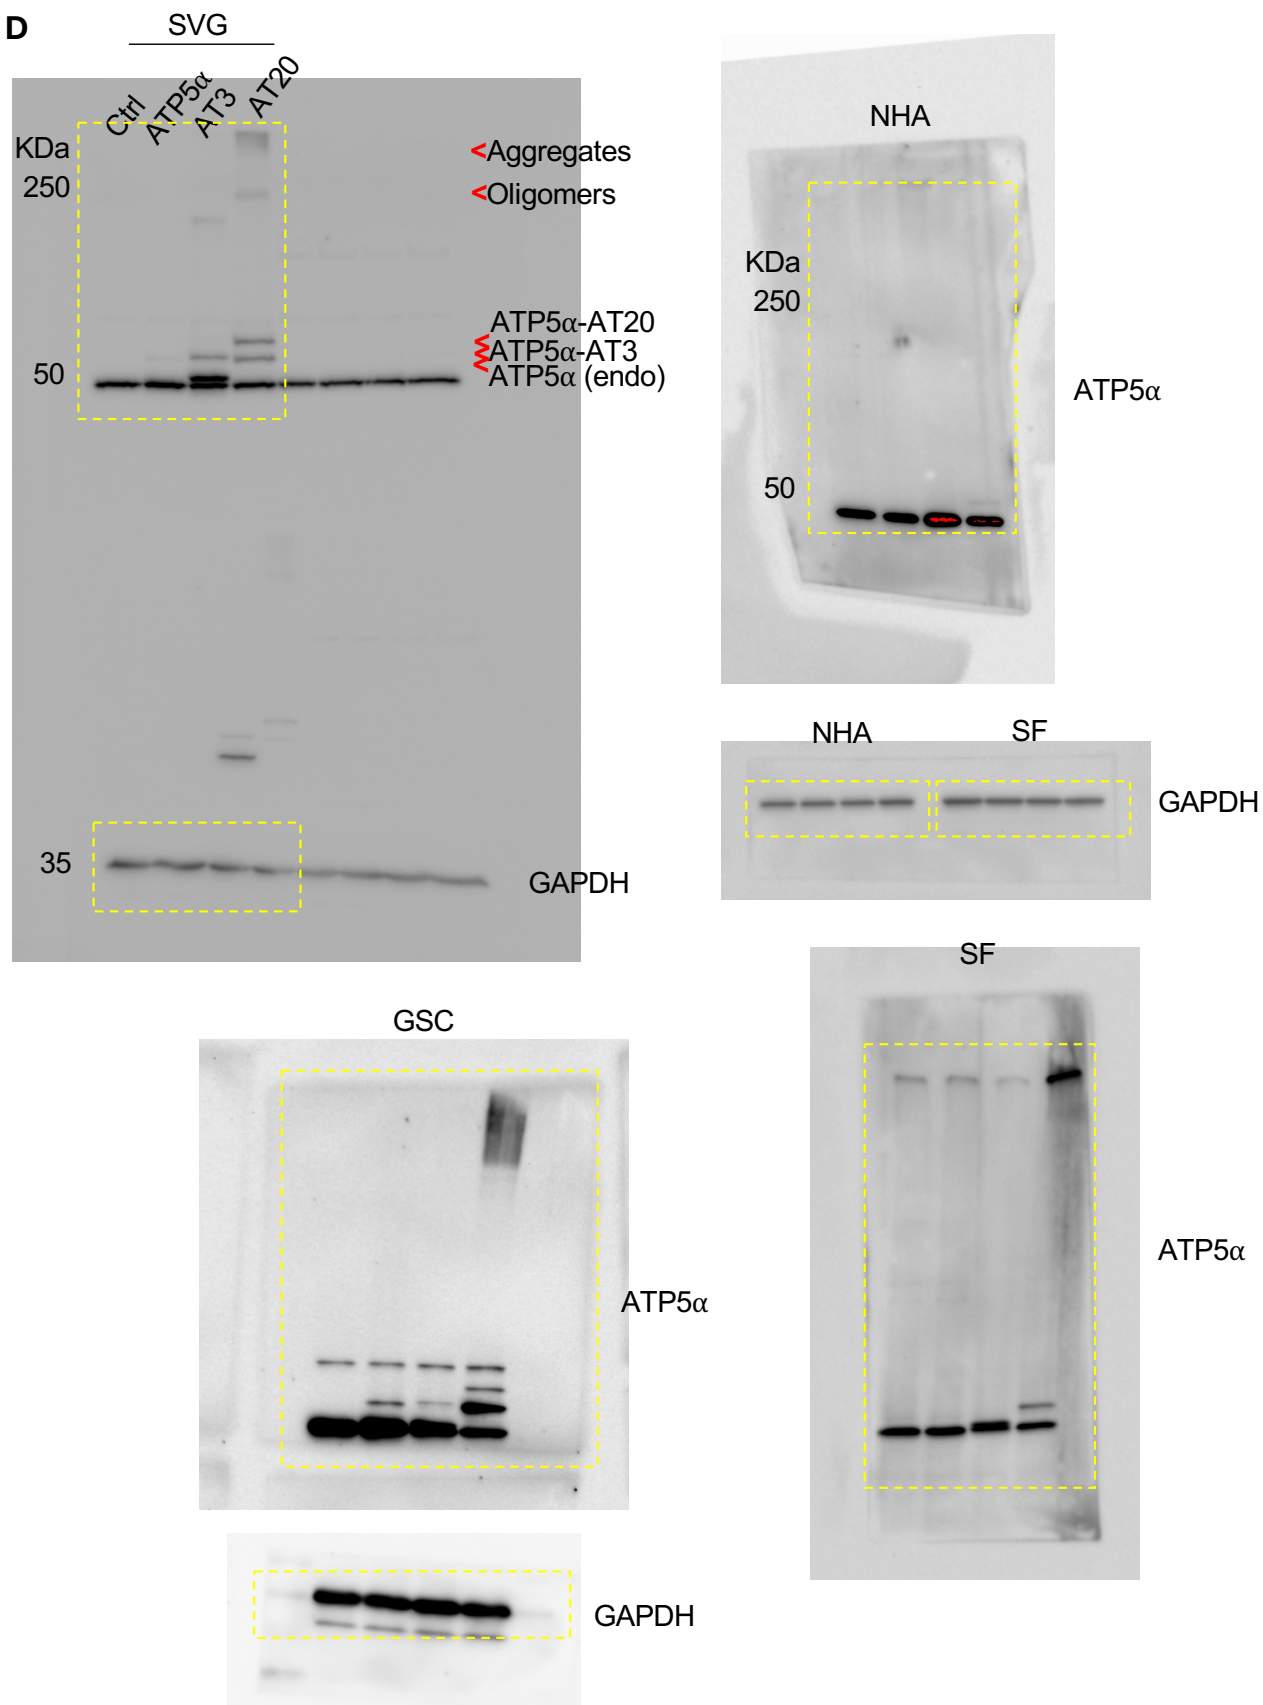

**Figure 1, source data 1**

Original membranes corresponding to Figure 1D.
