# Supplementary material for: Mitochondrial protein carboxyl-terminal alanine-threonine tailing promotes human glioblastoma growth by regulating mitochondrial function
Source: eLife journal article supplement (doi:10.7554/elife.99438), 2024-09-02
Supplement: fig1-figsupp1-data1 [file Figure 1-Figure supplement 1-source data 1.pdf › Figure 1-Figure supplement 1-source data 1.pdf]

Figure 1 – Figure Supplement 1C

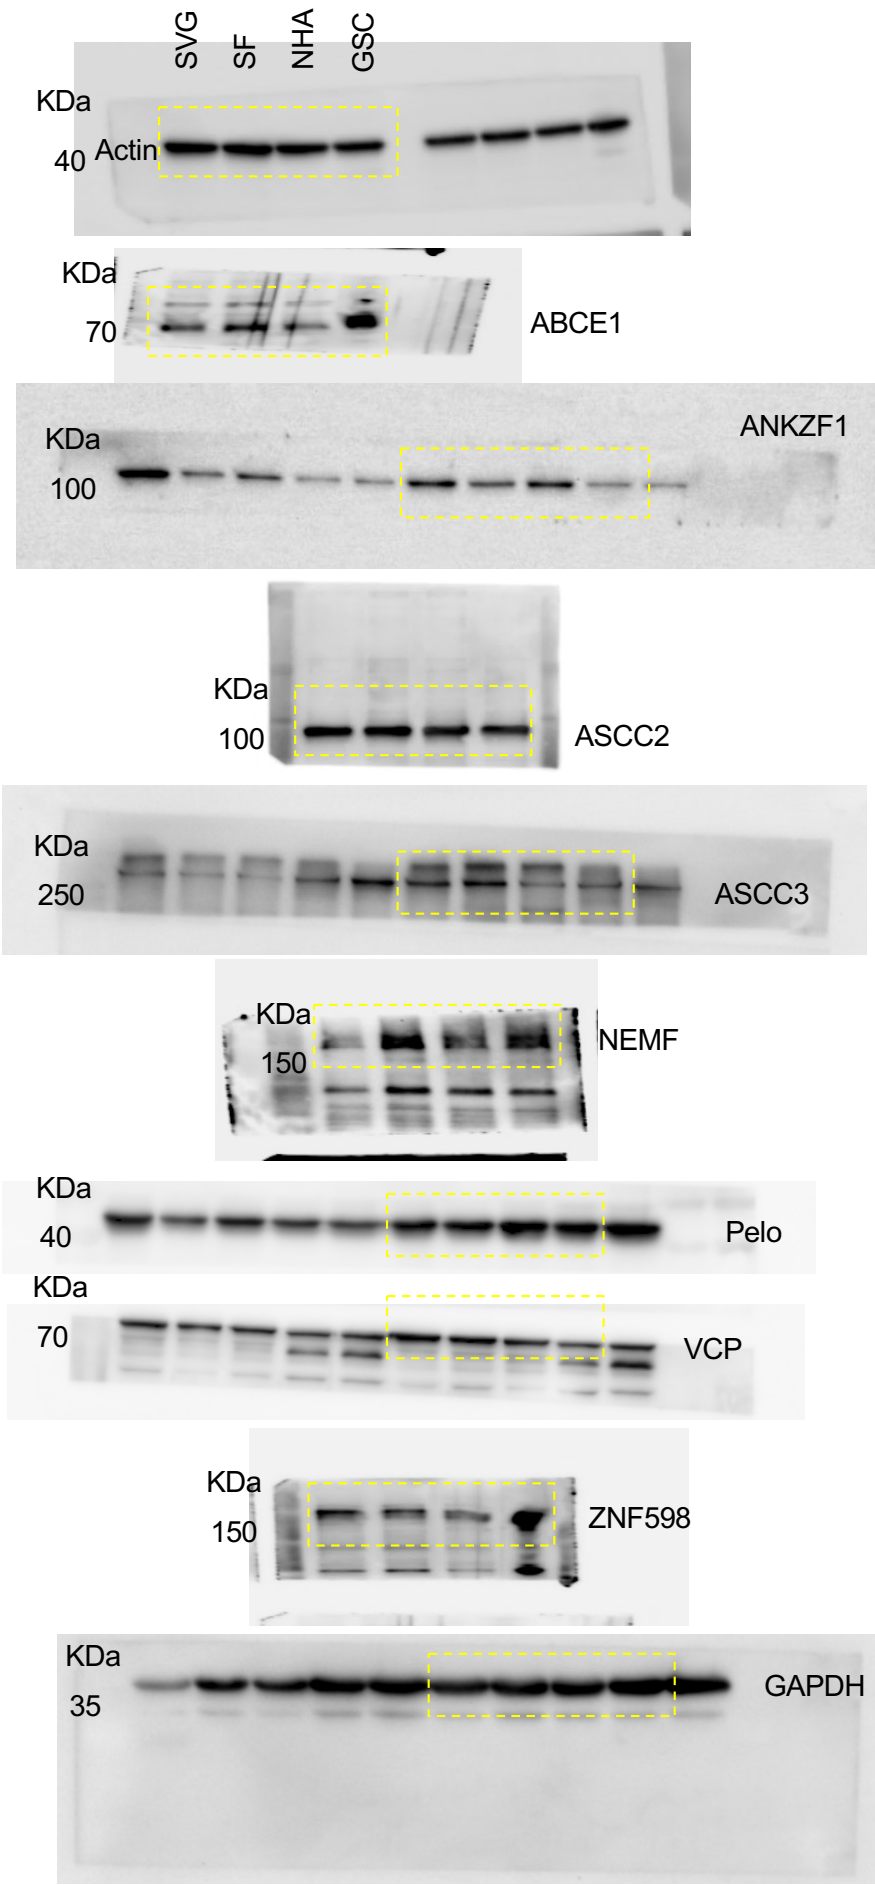

Figure 1-Figure Supplement 1, source data 1  
Original membranes corresponding to Figure 1-Figure Supplement 1C.
