# Supplementary material for: Mitochondrial protein carboxyl-terminal alanine-threonine tailing promotes human glioblastoma growth by regulating mitochondrial function
Source: eLife journal article supplement (doi:10.7554/elife.99438), 2024-09-02
Supplement: fig1-figsupp2-data1 [file Figure 1-Figure supplement 2-source data 1.pdf › Figure 1-Figure supplement 2-source data 1.pdf]

Figure 1 – Figure Supplement 2A

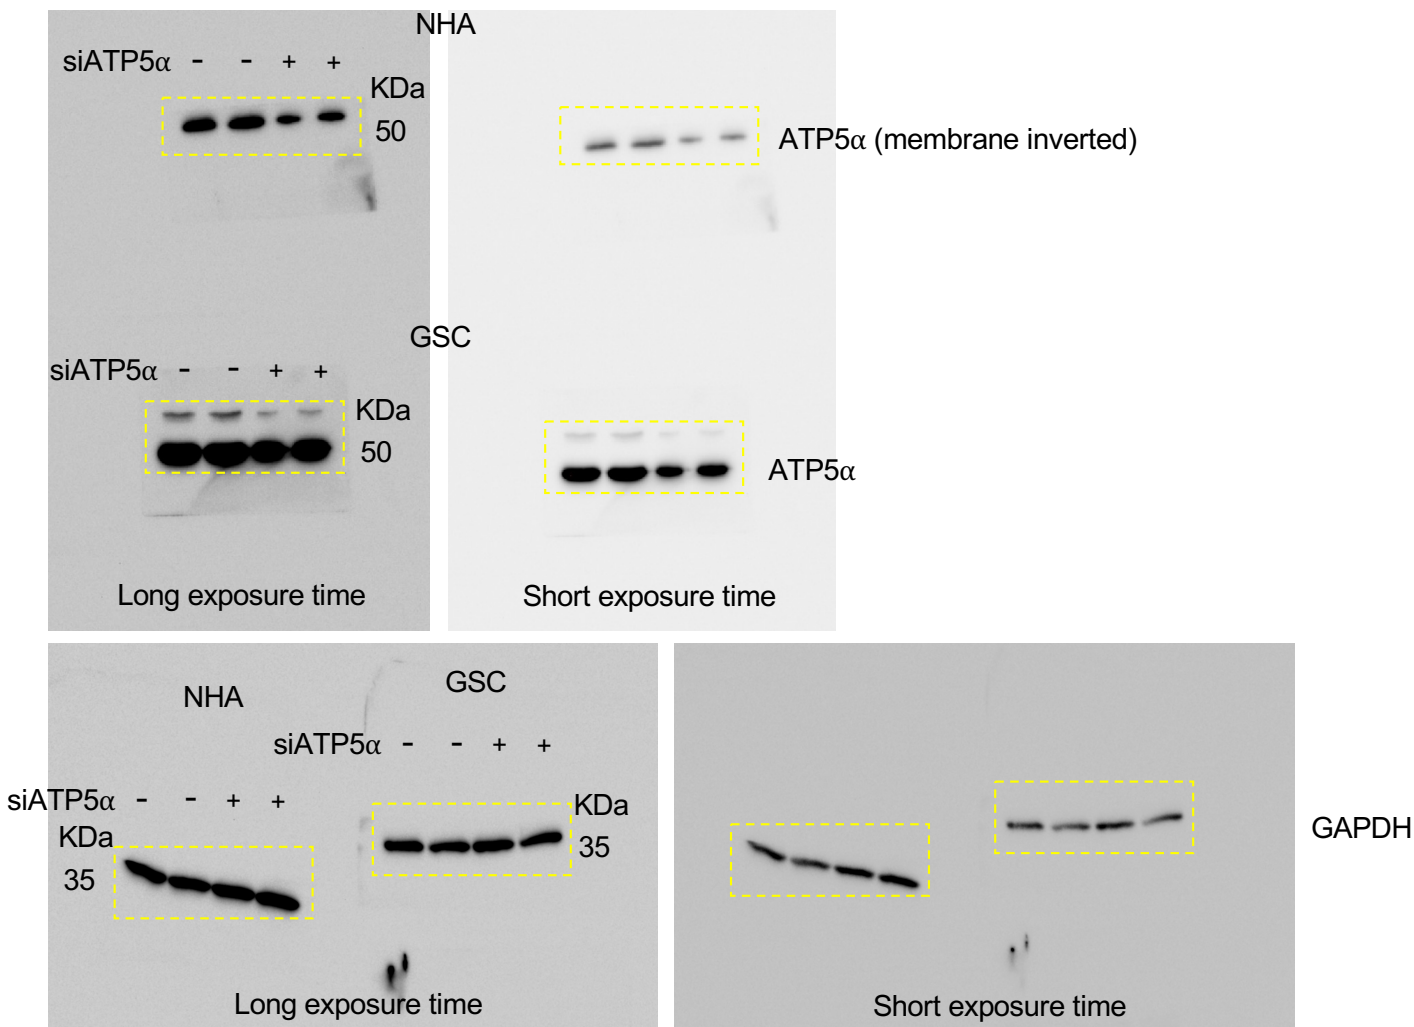

Figure 1-Figure Supplement 2, source data 1  
Original membranes corresponding to Figure 1-Figure Supplement 2A.

**Figure 1 – Figure Supplement 2B**

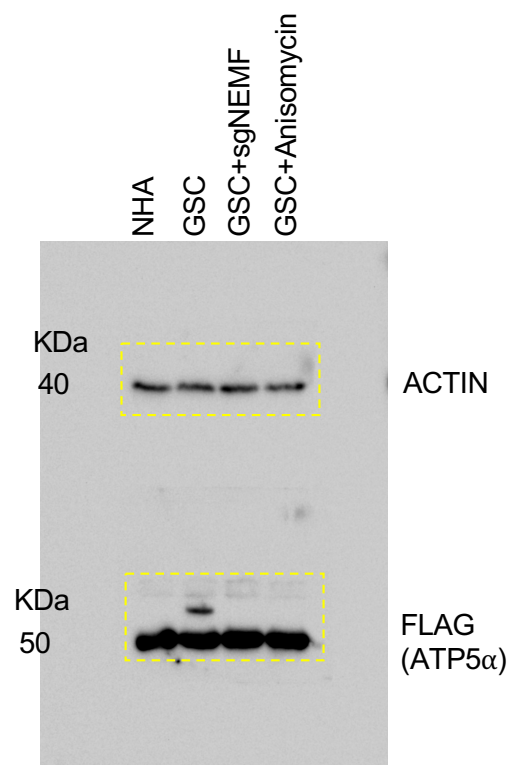

**Figure 1-Figure Supplement 2, source data 1**

Original membranes corresponding to Figure 1-Figure Supplement 2B.

Figure 1 – Figure Supplement 2E

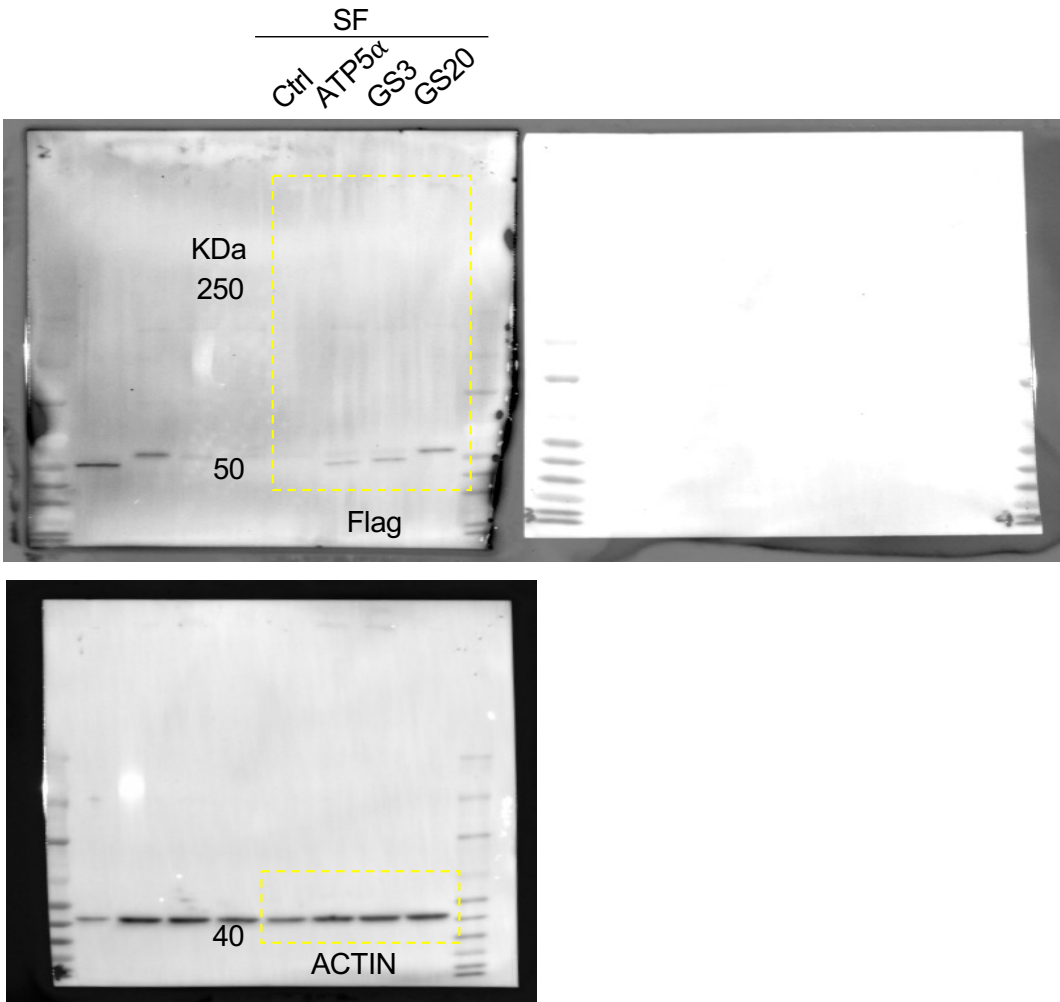

Figure 1-Figure Supplement 2, source data 1  
Original membranes corresponding to Figure 1-Figure Supplement 2E.
