# Supplementary material for: Mitochondrial protein carboxyl-terminal alanine-threonine tailing promotes human glioblastoma growth by regulating mitochondrial function
Source: eLife journal article supplement (doi:10.7554/elife.99438), 2024-09-02
Supplement: fig2-figsupp1-data1 [file Figure 2-Figure supplement 1-source data 1.pdf › Figure 2-Figure supplement 1-source data 1.pdf]

Figure 2 – Figure Supplement 1D

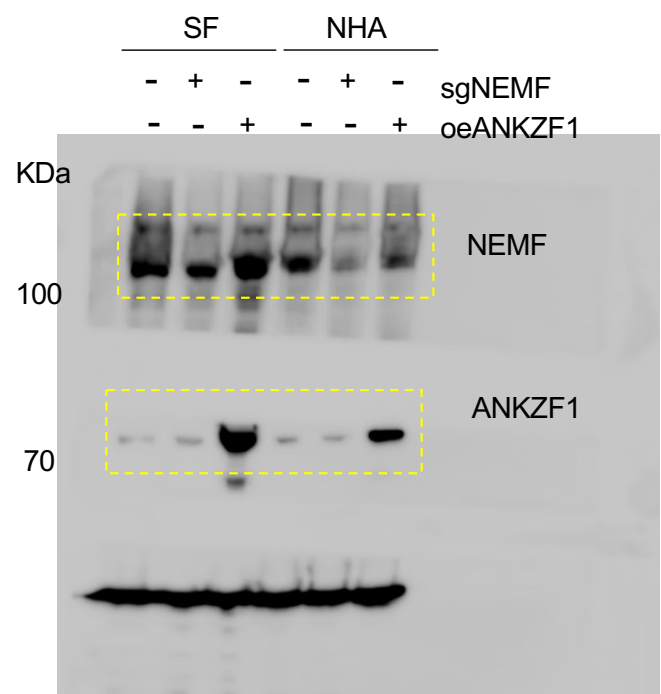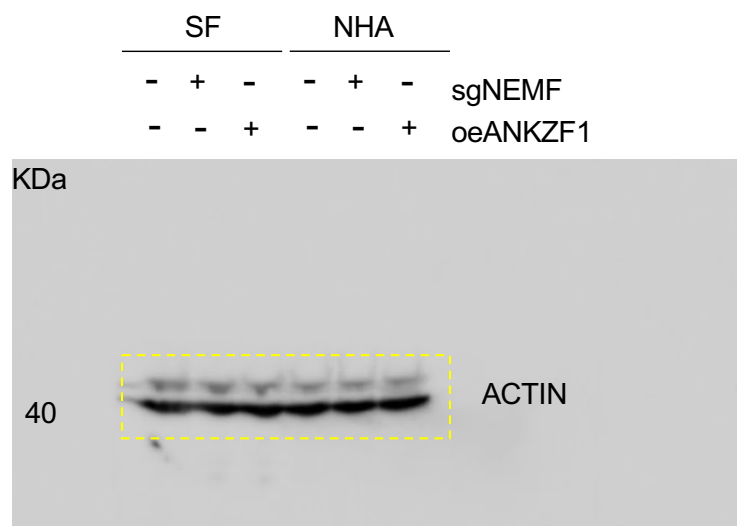

Figure 2-Figure Supplement 1, source data 1  
Original membranes corresponding to Figure 2-Figure Supplement 1D.
