# Supplementary material for: Mitochondrial protein carboxyl-terminal alanine-threonine tailing promotes human glioblastoma growth by regulating mitochondrial function
Source: eLife journal article supplement (doi:10.7554/elife.99438), 2024-09-02
Supplement: fig3-figsupp2-data1 [file Figure 3-Figure supplement 2-source data 1.pdf › Figure 3-Figure supplement 2-source data 1.pdf]

Figure 3 – Figure Supplement 2C

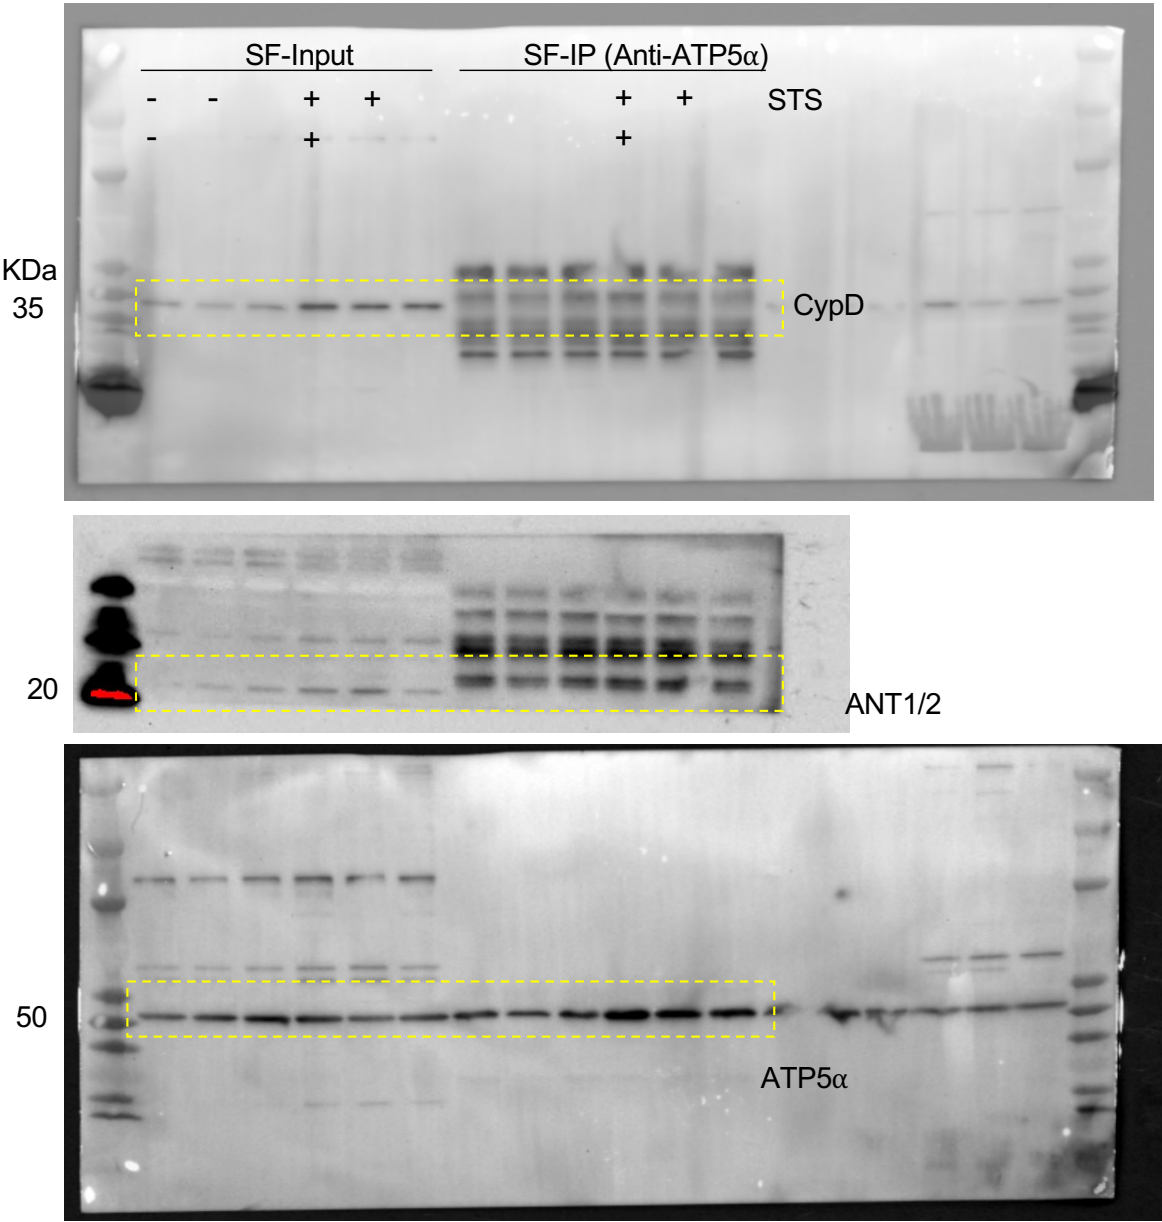

Figure 3-Figure Supplement 2, source data 1  
Original membranes corresponding to Figure 3-Figure Supplement 2C.

Figure 3 – Figure Supplement 2D

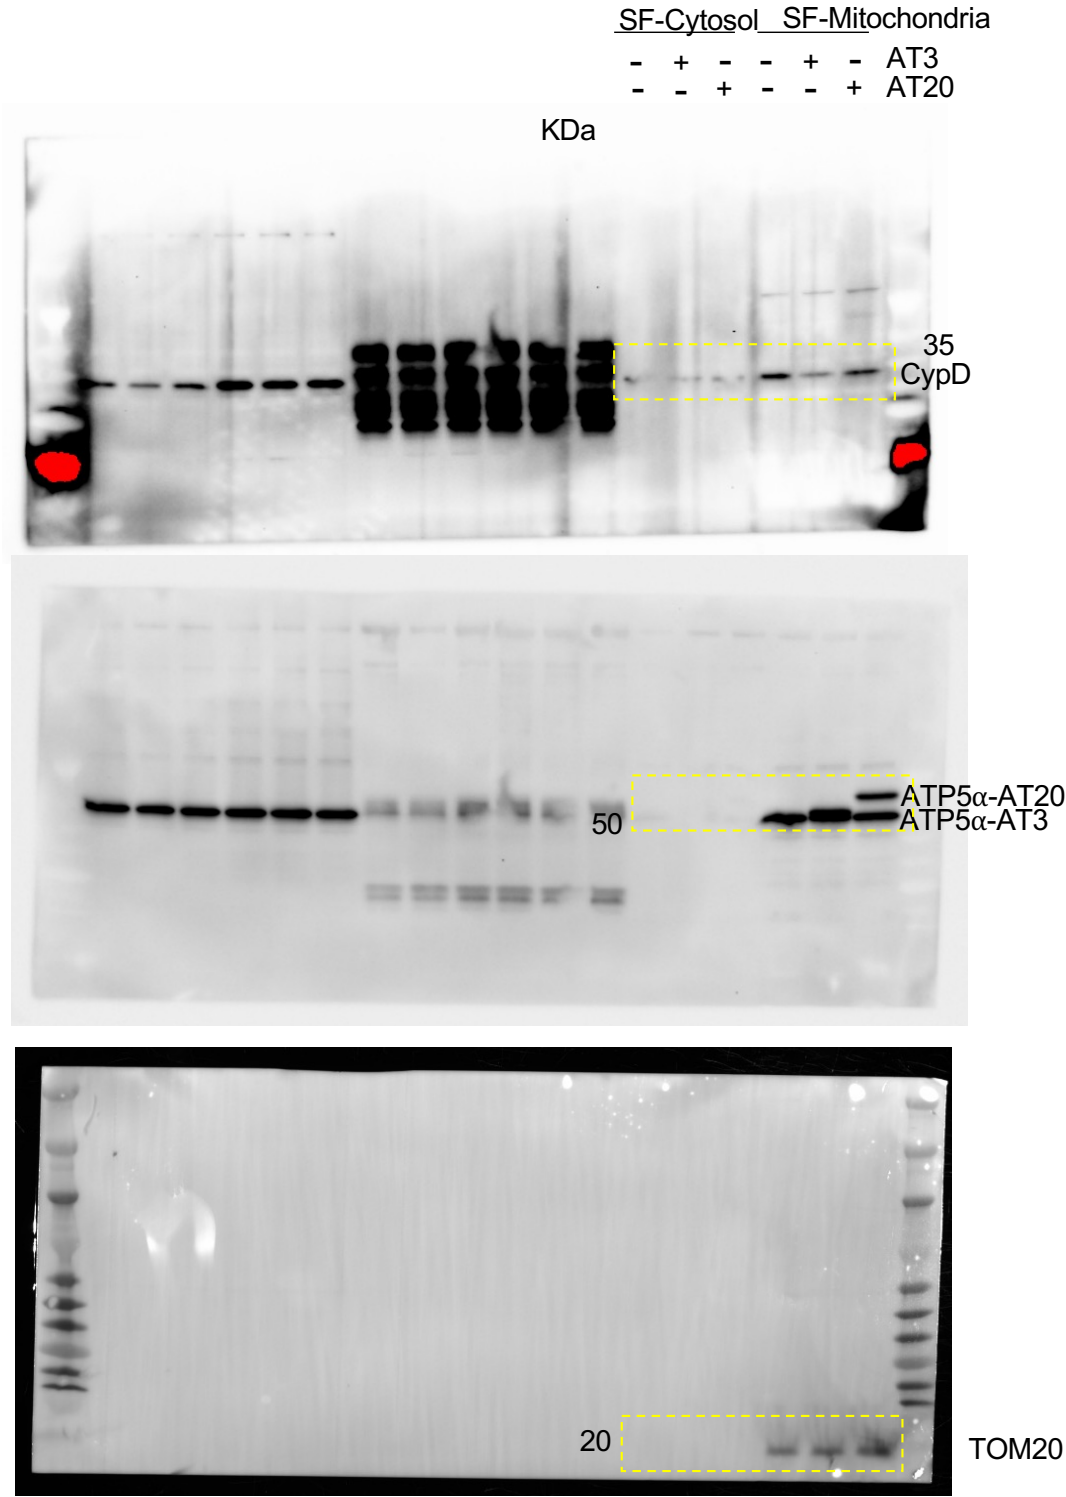

Figure 3-Figure Supplement 2, source data 1  
Original membranes corresponding to Figure 3-Figure Supplement 2D.
