# Supplementary material for: Mitochondrial protein carboxyl-terminal alanine-threonine tailing promotes human glioblastoma growth by regulating mitochondrial function
Source: eLife. 2026 Jan 29;13:RP99438. doi: 10.7554/eLife.99438 (PMC12854676; doi:10.7554/eLife.99438)
Supplement: Figure 1—figure supplement 1—source data 3. [file elife-99438-fig1-figsupp1-data3.xlsx]

## Sheet: Figure 1-Figure supplement 1
	Figure S1B
	Immunofluorescence staining shows elevated NEMF and reduced ANKZF1 endogenous protein levels in the tumor tissue of the GBM mouse model compared to wild-type brain tissue. Tumor identification is indicated by GFP (green). Quantification of A (n=3; unpaired Student's t-test; ****, P < 0.0001).
		NEMF	P.Value	Summary
	Normal	95.4134
		104.99
		99.5967
	SB28	1015.76	5.7e-05	****
		868.791
		889.864
		ANKZF1	P.Value	Summary
	Normal	102.268
		99.6855
		98.0468
	SB28	24.1766	<0.000001	****
		23.1552
		25.6018
