# Supplementary material for: Mitochondrial protein carboxyl-terminal alanine-threonine tailing promotes human glioblastoma growth by regulating mitochondrial function
Source: eLife. 2026 Jan 29;13:RP99438. doi: 10.7554/eLife.99438 (PMC12854676; doi:10.7554/eLife.99438)
Supplement: Figure 1—figure supplement 2—source data 3. [file elife-99438-fig1-figsupp2-data3.xlsx]

## Sheet: Figure 1-Figure supplement 2
	Figure S2D
	Immunofluorescence staining shows that Flag-tagged ATP5⍺-AT3 and ATP5⍺-AT20 (green) form aggregates in GBM and control cells, using TOM20 (red) as a mitochondrial marker. Quantification of C (n=3; chi-squared test; ****, P < 0.0001); the total number of cells counted is indicated in the columns.
		aggregates	no aggregates	P.Value	Summary
	SVG-Ctrl	8	91
	SVG-AT3	14	85	0.1748	ns
	SVG-AT20	43	56	<0.0001	****
	NHA-Ctrl	5	94
	NHA-AT3	5	94	>0.9999	ns
	NHA-AT20	23	76	0.0002	***
	SF-Ctrl	1	98
	SF-AT3	4	95	0.1742	ns
	SF-AT20	32	67	<0.0001	****
	GSC-Ctrl	8	91
	GSC-AT3	14	85	0.1748	ns
	GSC-AT20	81	18	<0.0001	****
	Figure S2G
	Immunofluorescence staining shows that Flag-tagged ATP5⍺-GS3 and ATP5⍺-GS20 (green) do not form aggregates in GBM cells, using TOM20 (red) as a mitochondrial marker. Quantification of F (n=3; chi-squared test; ns, not significant); the total number of cells counted is indicated in the columns.
		aggregates	no aggregates	P.Value	Summary
	SF-Ctrl	0	60
	SF-ATP5⍺	1	59	0.3153	ns
	SF-AT3	1	64	0.3347	ns
	SF-AT20	1	67	0.3457	ns
