# Supplementary material for: Mitochondrial protein carboxyl-terminal alanine-threonine tailing promotes human glioblastoma growth by regulating mitochondrial function
Source: eLife. 2026 Jan 29;13:RP99438. doi: 10.7554/eLife.99438 (PMC12854676; doi:10.7554/eLife.99438)
Supplement: Figure 1—figure supplement 3—source data 1. [file elife-99438-fig1-figsupp3-data1.xlsx]

## Sheet: Figure 1-Figure supplement 3
	Figure S3B
	Immunofluorescence staining shows that endogenous NDUS3 protein aggregates in GBM cells, with TOM20 (red) as a mitochondrial marker. White arrows indicate NUDS3 protein aggregates. Quantification of A (n=3; chi-squared test; *, P < 0.05); the total number of cells counted is indicated in the columns.
		aggregates	no aggregates	P.Value	Summary
	NHA	0	25
	SF	5	20	0.0184	*
	GSC	7	25	0.0125	*
	Figure S3D
	Fluorescence intensity profiles show ATP5⍺ (red) and TOM20 (blue) signals in wild-type and tumor tissues.
		Normal brain tissue		Transplanted SB28 glioma
	Distance	ATP5⍺	TOMM20	ATP5⍺	TOMM20
	0	1900.17	1555.15	1058	592
	0.077991	1939.61	1673.15	1862	502
	0.155981	1975.51	1590.61	1342	628
	0.233972	1924.54	1490.64	1684	48
	0.311963	1857.14	1498.78	1564	700
	0.389954	1857.14	1498.78	940	40
	0.467944	1847.54	1607.83	975	1410
	0.545935	1914.78	1686.81	1340	984
	0.623926	1898.86	1689.76	1340	984
	0.701917	1944.91	1929.19	820	1222
	0.779907	1962.51	1799.73	910	466
	0.857898	2079.8	1750.44	956	320
	0.935889	2148.91	1798.78	745	820
	1.01388	2146.51	1769.73	621	440
	1.09187	2266.22	1855.56	861	1014
	1.16986	2185.7	1804.54	970	142
	1.24785	2217.09	2013.69	924	272
	1.32584	2224.73	1915.69	1180	328
	1.40383	2256.66	1998.95	1234	772
	1.48182	2267.97	1961.73	1519	326
	1.55981	2243.02	1917.32	1750	108
	1.6378	2293.56	1957.42	1463	288
	1.7158	2258.68	1917.46	1463	288
	1.79379	2425.81	1979.19	1643	106
	1.87178	2380.29	1888.34	1085	40
	1.94977	2380.29	1888.34	763	338
	2.02776	2479.22	2089.53	983	24
	2.10575	2493.37	1887.29	614	698
	2.18374	2547.85	1971.39	555	494
	2.26173	2450.19	1972.78	645	118
	2.33972	2450.93	1885.15	528	190
	2.41771	2328.36	2075.53	324	528
	2.4957	2352.78	1951.59	443	650
	2.57369	2287.68	2044.71	615	334
	2.65169	2304.02	1935.76	642	62
	2.72967	2304.02	1935.76	553	326
	2.80767	2320.49	2019.9	553	326
	2.88566	2443.7	2012.27	1119	634
	2.96365	2460.07	2072.88	842	492
	3.04164	2453.51	2103.32	641	928
	3.11963	2400.14	2166.58	1028	298
	3.19762	2444.14	1974.98	1173	518
	3.27561	2343.46	1893.76	1127	724
	3.3536	2398.17	2095.76	1604	432
	3.43159	2142.49	2063.59	1664	1226
	3.50958	2109.85	2059.76	2473	1268
	3.58757	1960.76	1659.36	2211	1024
	3.66556	1928.41	1749.22	2080	1146
	3.74356	1860.83	1649.93	2895	752
	3.82154	1941.58	1577.49	1856	1268
	3.89954	1959.73	1765.22	1856	1268
	3.97753	2023.24	1823.59	1947	248
	4.05552	1988.54	1704.88	1596	712
	4.13351	2054.59	1834.98	1768	1150
	4.2115	2209.73	1691.22	1944	828
	4.28949	2209.73	1691.22	2228	1258
	4.36748	2167.51	1840.54	2508	528
	4.44547	2186.39	1908.58	2189	1240
	4.52346	2335.91	1780.34	2746	1148
	4.60145	2359.27	1797.83	2533	990
	4.67944	2397.09	1881.63	3195	1990
	4.75743	2440.2	2095.25	3794	826
	4.83542	2377.36	2156.81	3020	148
	4.91342	2433.37	2072.81	3897	880
	4.99141	2411.73	2215.09	2679	1154
	5.0694	2360	2197.42	3284	1546
	5.14739	2384.98	2224.1	3036	1702
	5.22538	2333.37	2295.59	2643	478
	5.30337	2284.51	2075.59	2696	1152
	5.38136	2252.22	2153.56	2639	820
	5.45935	2283.7	2171.76	2895	926
	5.53734	2368.09	2067.12	2258	1038
	5.61533	2378.44	1879.49	2573	848
	5.69332	2333.22	2190.88	2453	554
	5.77131	2333.22	2190.88	2737	2004
	5.8493	2475.88	1967.53	2200	1484
	5.92729	2497.81	2252.85	2531	780
	6.00529	2385.75	2075.32	2318	486
	6.08328	2332.83	2036.37	2406	1814
	6.16127	2275.81	2098.95	1843	948
	6.23926	2205.09	1841.29	3050	1510
	6.31725	2168.1	1998.41	3154	298
	6.39524	2119.24	2038.98	4162	1192
	6.47323	2126.12	1939.83	2711	1680
	6.55122	2140.49	1894.14	3215	1516
	6.62921	2093.09	2001.25	3383	3152
	6.7072	2054.25	2008.64	4259	2278
	6.78519	2088.41	2021.36	4615	1302
	6.86318	1999.54	1853.36	3956	2320
	6.94117	2155.68	2151.49	3343	1956
	7.01917	2150.9	2000.54	2924	2442
	7.09716	2272.53	2069.56	3383	1566
	7.17515	2335.81	1985.83	3383	1566
	7.25314	2471.47	2198.34	3008	748
	7.33113	2471.47	2198.34	2877	736
	7.40912	2586.68	2204.64	2902	1546
	7.48711	2705.09	2199.49	3485	318
	7.5651	2717.36	2140.98	2676	1292
	7.64309	2685.85	2171.29	2795	1912
	7.72108	2674.8	2024.64	2142	1418
	7.79907	2586.76	2000.2	2918	602
	7.87706	2531.05	1847.53	2899	926
	7.95505	2565.56	1994.37	2466	2378
	8.03304	2532.85	1816.37	2777	456
	8.11103	2657.66	1807.22	1903	464
	8.18903	2599	1786.88	2035	560
	8.26702	2538.9	1786.1	2035	560
	8.34501	2500.75	1906	1267	772
	8.423	2559.1	1949.29	1388	818
	8.50099	2677.25	2145.39	1706	766
	8.57898	2628.7	2003.53	1775	498
	8.65697	2624.81	1915.09	1657	768
	8.73496	2608.78	1918.31	1921	1058
	8.81295	2499.44	2044.98	3302	708
	8.89094	2499.44	2044.98	2587	1874
	8.96893	2456.29	2162.24	2360	882
	9.04692	2509.86	2227.97	1774	200
	9.12491	2571.75	2099.59	1516	508
	9.2029	2538.05	2418.75	1937	526
	9.2809	2541.12	2250.3	1267	1284
	9.35889	2560.27	2266.1	1267	1284
	9.43688	2683.73	2262.81	1107	144
	9.51487	2726.68	2598.44	1225	436
	9.59286	2743.07	2278.03	1044	192
	9.67085	2743.07	2278.03	1422	294
	9.74884	2865.64	2425.83	1085	288
	9.82683	2962.78	2556.27	1091	172
	9.90482	3018.02	2573.49	567	1182
	9.98281	3006.2	2327.76	501	344
	10.0608	3049.58	2467.02	729	762
	10.1388	3105.17	2552	442	432
	10.2168	3057.68	2672.44	553	346
	10.2948	3165.09	2727.56	617	76
	10.3728	3222.34	2524	863	244
	10.4508	3222.49	2473.42	648	470
	10.5288	3246.83	2713.25	882	180
	10.6067	3312.63	2494.03	727	278
	10.6847	3167.56	2538.98	1289	186
	10.7627	3250.64	2569.12	1191	670
	10.8407	3123.25	2601.39	1097	532
	10.9187	2991.02	2774.41	1656	96
	10.9967	3020.53	2635.25	1494	110
	11.0747	3093.54	2659.49	1689	90
	11.1527	3072.91	2681.29	2216	566
	11.2307	3026.85	2710.68	2431	1080
	11.3087	3159.91	2791.12	2725	686
	11.3866	3215.93	2713.7	3501	842
	11.4646	3308.47	2697.36	4081	1082
	11.5426	3227.71	2388.68	5233	1342
	11.6206	3208.1	2551.83	5233	1342
	11.6986	3269.86	2657.29	6339	1438
	11.7766	3260.44	2478.78	6995	892
	11.8546	3419.14	2641.97	6198	712
	11.9326	3419.14	2641.97	5291	1116
	12.0106	3428.14	2680.54	4881	566
	12.0886	3464.9	2626.54	4324	796
	12.1666	3501.59	2579.7	3822	1198
	12.2445	3413.09	2742.07	3548	754
	12.3225	3377.9	2677.36	3830	1078
	12.4005	3423.51	2593.22	3261	332
	12.4785	3439.49	2669.97	3186	734
	12.5565	3550	2445.49	2568	268
	12.6345	3636.64	2571.32	2655	608
	12.7125	3522.91	2500.71	2655	608
	12.7905	3631.91	2446	2394	1064
	12.8685	3481.9	2323.29	2186	1860
	12.9465	3369.64	2251.97	2206	748
	13.0244	3221.47	2205.97	1934	656
	13.1024	3068.59	2492.34	1901	1214
	13.1804	3090.61	2325.83	1638	552
	13.2584	2905.14	2139.12	1562	490
	13.3364	2813.19	2110	1278	582
	13.4144	2732.66	2048.64	1506	772
	13.4924	2719.44	1998.07	1678	350
	13.5704	2609.25	2072.75	1656	470
	13.6484	2418.86	1931.66	1439	2276
	13.7264	2282.27	1813.83	1629	154
	13.8044	2260.64	1745.73	1629	154
	13.8824	2185.12	1826.58	1664	1780
	13.9603	2105.91	1570.03	1253	2322
	14.0383	2040.76	1651.39	1015	1322
	14.1163	1977.07	1667.36	2023	840
	14.1943	1916.59	1585.69	2234	550
	14.2723	1916.59	1585.69	1949	828
	14.3503	2108.42	1537.66	2830	1312
	14.4283	2164.54	1558.85	2331	990
	14.5063	2337.81	1518	2128	82
	14.5843	2561.12	1792.88	2047	1646
	14.6623	2711.86	1677.73	2641	400
	14.7402	2786.8	1616.07	1345	1062
	14.8182	2913.02	1578.58	2162	1112
	14.8962	2843.02	1635.02	1578	778
	14.9742	2850.12	1835.76	1638	1132
	15.0522	2794.56	1829.9	1250	448
	15.1302	2637.63	1630.31	1958	830
	15.2082	2498.17	1602.47	1314	1044
	15.2862	2318.64	1457.8	2098	556
	15.3642	2258.54	1541.86	1720	1000
	15.4422	2116.9	1423.36	1412	98
	15.5201	2005.03	1278.41	1112	784
	15.5981	2107.2	1166.98	1508	442
	15.6761	2211.83	1342.85	1323	284
	15.7541	2280.47	1385.32	1112	1172
	15.8321	2383.98	1403.97	1700	950
	15.9101	2406.97	1284	1629	1896
	15.9881	2442.02	1350.34	1581	258
	16.0661	2418.46	1422.75	1532	744
	16.1441	2389.39	1436.34	1343	110
	16.2221	2378.2	1496.64	2319	1442
	16.3001	2429.59	1519.09	2139	690
	16.3781	2396.37	1440.98	2352	596
	16.456	2487.19	1543.69	3275	238
	16.534	2487.19	1543.69	2520	886
	16.612	2610.64	1613.66	3212	2198
	16.69	2808.59	1556.91	3770	946
	16.768	2920.32	1715.73	3645	1040
	16.846	2977.61	1631.83	3437	986
	16.924	3060.85	1720.03	4301	1360
	17.002	3159.66	1770.88	4110	986
	17.08	3308.7	1677.9	4110	986
	17.158	3400.05	1954.95	4720	932
	17.2359	3465.14	2077.97	3351	1216
	17.3139	3465.14	2077.97	3508	1044
	17.3919	3477.2	2056.95	2891	780
	17.4699	3430.97	2106.44	2624	906
	17.5479	3289.3	2390.91	2288	92
	17.6259	3258.59	2147.36	1890	308
	17.7039	3302.03	2598.44	2170	714
	17.7819	3473.68	2560	2083	884
	17.8599	3795.64	2461.63	1619	348
	17.9379	3933.03	2814.17	1697	112
	18.0159	4026.95	2845.86	1611	96
	18.0938	4092.39	2948.24	1273	198
	18.1718	4013.93	2854.61	1273	198
	18.2498	3815.15	2764.68	1305	894
	18.3278	3802.3	2599.56	1582	366
	18.4058	3571.97	2762.47	1872	544
	18.4838	3575.76	2650.78	2174	602
	18.5618	3495.09	2564.91	1646	1066
	18.6398	3517.27	2400.24	1349	606
	18.7178	3477.37	2294.68	1245	516
	18.7958	3542.05	2289.93	1206	1510
	18.8738	3542.05	2289.93	1894	382
	18.9518	3450.53	2242.78	1357	538
	19.0297	3090.17	2381.8	1304	1552
	19.1077	3031.02	2239.66	1635	2344
	19.1857	2953.8	2518.14	1741	1066
	19.2637	2922.25	2489.97	1741	1066
	19.3417	2832.54	2519.02	2500	678
	19.4197	2782.54	2534.1	2333	688
	19.4977	2745.59	2500.3	2564	1316
	19.5757	2912.51	2701.05	3714	1392
	19.6537	2898.97	2820.17	3213	1414
	19.7316	2857.19	2749.86	2579	828
	19.8096	2981.95	2639.63	2289	948
	19.8876	3082.07	2625.32	2856	312
	19.9656	2929.03	2642.41	3314	1834
	20.0436	2994.29	2740.1	3139	1704
	20.1216	3060.95	2542.2	2751	1502
	20.1996	3044.68	2403.12	2181	244
	20.2776	3047.22	2356.34	3698	2150
	20.3556	2969.88	2418.14	2944	1052
	20.4336	2969.88	2418.14	2824	672
	20.5116	2997.37	2344.71	2148	506
	20.5895	2971.68	2389.22	1985	1672
	20.6675	2979.56	2447.05	2041	1828
	20.7455	2966.9	2381.7	2548	1460
	20.8235	2963.39	2377.63	2422	1156
	20.9015	2820.76	2430.2	2425	596
	20.9795	2672.36	2081.46	2974	446
	21.0575	2491.17	2138.3	2426	1916
	21.1355	2491.17	2138.3	2696	2262
	21.2135	2433.44	2142.24	2531	464
	21.2915	2281.7	2070.27	2004	1502
	21.3695	2297.73	2089.39	2371	2056
	21.4474	2122.25	2086.91	1853	4070
	21.5254	2220.44	2301.15	1723	2240
	21.6034	2154.15	2335.46	2259	2588
	21.6814	2128.91	2215.8	2428	2534
	21.7594	2255.95	2262.47	4992	1700
	21.8374	2208.83	2249.49	6559	1804
	21.9154	2208.83	2249.49	7523	1604
	21.9934	2400.37	2251.36	11274	1828
	22.0714	2462.75	2110.64	11234	1218
	22.1494	2590.02	2236	11593	1936
	22.2274	2734.29	2432.78	11045	1554
	22.3054	2933.03	2531.09	7744	1246
	22.3833	2924.58	2400.58	7535	1220
	22.4613	2930.73	2264.47	5058	772
	22.5393	3055.09	2308.88	5202	978
	22.6173	2950.3	2309.56	5202	978
	22.6953	2966.46	2286.91	5642	2152
	22.7733	3030.54	2447.05	5553	1084
	22.8513	2976.39	2260.98	5472	1736
	22.9293	3035.81	2430.17	8128	3370
	23.0073	2930.12	2319.29	6817	1418
	23.0852	2928.7	2092.88	4394	394
	23.1632	2913.76	2297.83	4437	1726
	23.2412	2978.97	2106.1	3441	110
	23.3192	2911.95	2223.7	2285	176
	23.3972	2783.36	2090.85	1673	74
	23.4752	2783.36	2090.85	859	394
	23.5532	2750.7	1988.64	895	168
	23.6312	2634.76	2042.85	773	58
	23.7092	2527.34	2142.17	773	58
	23.7872	2403.97	2101.02	354	118
	23.8652	2372.02	2263.19	627	122
	23.9431	2531.56	2376.58	725	704
	24.0211	2541	2223.7	315	408
	24.0991	2596.64	2307.19	1335	278
	24.1771	2686.56	2031.42	1284	1586
	24.2551	2629.34	2082.24	1662	1148
	24.3331	2588.22	2164.75	1877	1348
	24.4111	2526.78	2144.27	2868	484
	24.4891	2524.39	2293.46	3085	1394
	24.5671	2482.1	2160.64	3227	1066
	24.6451	2518.86	2247.8	3152	1224
	24.7231	2439.51	2190.64	2686	1922
	24.8011	2517.46	2308.91	2762	668
	24.879	2521.61	2117.09	2535	948
	24.957	2431.53	2165.7	2946	1960
	25.035	2436.3	2258.07	3117	1778
	25.113	2457.73	2274.98	3346	2238
	25.191	2413.49	2290.98	3297	550
	25.269	2442.54	2303.63	2762	1996
	25.347	2565.56	2343.19	3671	672
	25.425	2593.15	2227.8	3233	1794
	25.503	2642.25	2327.29	4085	552
	25.581	2770.03	2181.02	3655	1976
	25.659	2949.61	2284.91	5056	2002
	25.7369	2870.78	2517.56	4166	1306
	25.8149	2870.78	2517.56	4649	2118
	25.8929	2878.83	2699.76	4356	1562
	25.9709	3064.56	2393.12	4573	1844
	26.0489	2966.27	2607.19	3132	2048
	26.1269	3058.73	2456.71	2894	3140
	26.2049	3114.03	2500.2	3031	1680
	26.2829	3185.75	2420.47	3209	1236
	26.3609	3140.2	2444	2574	1278
	26.4388	3053.61	2450.91	2694	2934
	Figure S3E
	Immunofluorescence staining shows that endogenous ATP5⍺ protein forms aggregates in the tumor tissue from the GBM mouse model but not in the wild-type brain tissue, using TOM20 (blue) as a mitochondrial marker. Tumor identification is indicated by GFP (green). Quantification of C (n=3; chi-squared test; ****, P < 0.0001); the total number of cells counted is indicated in the columns.
		aggregates	no aggregates	P.Value	Summary
	Normal	1	99
	SB28	28	72	<0.0001	****
