# Supplementary material for: Mitochondrial protein carboxyl-terminal alanine-threonine tailing promotes human glioblastoma growth by regulating mitochondrial function
Source: eLife. 2026 Jan 29;13:RP99438. doi: 10.7554/eLife.99438 (PMC12854676; doi:10.7554/eLife.99438)
Supplement: Figure 1—source data 3. [file elife-99438-fig1-data3.xlsx]

## Sheet: Figure 1
	Figure 1A
	RQC gene expression levels in GBM tumor tissues (n=153) compared to normal brain tissues (n=206) (unpaired Student’s t-test; *, logFC (fold change)>1; adj.P.Val<0.001).
	Gene	logFC	AveExpr	t	P.Value	adj.P.Val
	RACK1	2.22455	9.04811	19.2464	2.62e-57	6.69e-56
	ASCC3	1.73822	2.71725	19.2721	2.05e-57	5.27e-56
	ASCC1	1.68958	4.25792	17.8774	1.2e-51	2.18e-50
	ASCC2	1.47147	4.1534	15.9118	1.43e-43	1.68e-42
	ABCE1	1.32826	3.81695	13.7925	4.69e-35	3.6e-34
	VCP	1.05007	6.32102	9.82894	2.33e-20	9.31e-20
	GIGYF2	0.985695	3.78642	10.2544	8e-22	3.41e-21
	MAP3K20	0.962218	1.86379	8.71129	1.1e-16	3.75e-16
	PELO	0.928606	2.28856	10.6012	4.85e-23	2.18e-22
	KLHDC10	0.854921	3.49232	9.06498	8.08e-18	2.88e-17
	EDF1	0.820912	8.4445	7.2786	2.12e-12	5.94e-12
	XRN1	0.80912	1.51837	8.5402	3.8e-16	1.26e-15
	LTN1	0.78641	1.9716	9.96282	8.14e-21	3.32e-20
	MKRN1	0.76937	5.74536	7.40007	9.65e-13	2.74e-12
	RCHY1	0.652648	4.27613	6.84021	3.4e-11	8.93e-11
	ZNF598	0.623804	4.00666	6.04358	3.76e-09	8.9e-09
	HBS1L	0.291107	4.70139	2.72854	0.00667281	0.0103705
	NEMF	0.194631	4.56696	2.57506	0.0104197	0.0158559
	ANKZF1	-0.436071	4.6203	-3.65006	0.000300886	0.000525859
	Figure 1F
	Quantification of E; Immunofluorescence staining shows endogenous ATP5α protein aggregates in GBM cells, with TOM20 as a mitochondrial marker. (n=3; chi-squared test; ***, P < 0.001; ****, P < 0.0001); the total number of cells counted is indicated in the columns.
		aggregates	no aggregates	P.Value	Summary
	SVG	3	96
	NHA	0	99	0.0809	ns
	SF	24	75	<0.0001	****
	GSC	11	88	0.0006	***
