# Supplementary material for: Mitochondrial protein carboxyl-terminal alanine-threonine tailing promotes human glioblastoma growth by regulating mitochondrial function
Source: eLife. 2026 Jan 29;13:RP99438. doi: 10.7554/eLife.99438 (PMC12854676; doi:10.7554/eLife.99438)
Supplement: Figure 2—figure supplement 1—source data 3. [file elife-99438-fig2-figsupp1-data3.xlsx]

## Sheet: Figure 2-Figure supplement 1
	Figure S4A
	JC-10 staining reveals elevated mitochondrial membrane potentials in GBM cells compared to NHA (control) cells (n=3; unpaired Student’s t-test; ***, P < 0.001).
		NHA	SF	GSC
	JC10 signal	0.514562	1.13898	1.27897
		0.558753	1.26376	1.14357
		0.529809	1.08243	1.37854
	P.Value		0.000339688	0.000453295
	Summary		***	***
	Figure S4C
	Analysis with BioTracker ATP‐red dye staining shows reduced mitochondrial ATP production in GBM cells compared to NHA (control) cells, using MitoTracker Green as the mitochondrial mass indicator for normalization. Quantification of (B) (n=3; unpaired Student’s t-test; ****, P < 0.0001).
		NHA	SF	GSC
	JC10 signal	101.744	60.3696	52.7654
		103.597	54.8531	43.0408
		94.6598	56.667	52.621
			53.9549	57.0912
	P.Value		2.10804e-05	8.29386e-05
	Summary		****	****
	Figure S4E
	JC-10 staining reveals no change of mitochondrial membrane potential in GBM cells, upon overexpression of ATP5⍺-GS3 and ATP5⍺-GS20 (n=3; unpaired Student’s t-test; ns, not significant).
		Ctrl	ATP5⍺	GS3	GS20
	JC10 signal	1.73913	1.48837	1.36735	1.23809
		1.2973	1.69643	1.375	1.23077
		1.27778	1.54054	1.375	1.28571
	P.Value		0.448023	0.685635	0.285975
	Summary		ns	ns	ns
