# Supplementary material for: Mitochondrial protein carboxyl-terminal alanine-threonine tailing promotes human glioblastoma growth by regulating mitochondrial function
Source: eLife. 2026 Jan 29;13:RP99438. doi: 10.7554/eLife.99438 (PMC12854676; doi:10.7554/eLife.99438)
Supplement: Figure 2—source data 3. [file elife-99438-fig2-data3.xlsx]

## Sheet: Figure 2
	Figure 2A
	TMRM staining shows a high mitochondrial membrane potential in patient-derived GSC cells (n=3; unpaired Student’s t-test; ***, P < 0.001; ****, P < 0.0001).
		hNSC	GSC33	GSC99	GSC105	GSC107
	TMRM signal	96.1948	118.093	129.356	147.628	132.811
		102.753	108.907	139.197	168.202	131.606
		97.4125	119.152	132.003	155.92	129.991
		100.642	116.749	138.74	148.647	150.519
		102.998	121.991	140.983	141.195	133.34
	P.Value		0.000178708	8.27037e-07	4.51276e-06	2.01307e-05
	Summary		***	****	****	****
	Figure 2B
	ATP measurement shows a low mitochondrial ATP production in patient-derived GSC cells (n=3; unpaired Student’s t-test; **, P < 0.01; ***, P < 0.001).
		hNSC	GSC33	GSC99	GSC105	GSC107
	ATP red	104.112	90.4227	81.7613	83.9486	77.3056
		99.5378	82.1555	85.9432	77.1904	64.7838
		89.3627	87.0931	88.6673	77.3087	73.2761
		93.0401	81.6195	77.3224	81.732	83.9038
		103.965	77.2751	79.3069		78.1995
		109.983	76.9862	85.0666	91.007	72.7326
	P.Value		0.0010362	0.00080072	0.00206786	0.000114628
	Summary		**	***	**	***
	Figure 2C
	JC-10 staining reveals a reduced mitochondrial membrane potential in GBM cells, but not in NHA control cells, upon genetic inhibition of the msiCAT-tailing pathway (n=3; unpaired Student’s t-test; ***, P < 0.001; ****, P < 0.0001; ns, not significant).
		SF			NHA
		Ctrl	sgNEMF	oeANKZF1	Ctrl	sgNEMF	oeANKZF1
	JC10 signal	1.06818	0.377778	0.4375	0.535714	0.56	0.580645
		1.18182	0.375	0.428571	0.592593	0.5	0.516129
		1.17857	0.388889	0.426667	0.555556	0.533333	0.5
	P.Value		3.49063e-05	4.53337e-05		0.278112	0.384363
	Summary		****	****		ns	ns
	Figure 2D
	JC-10 staining reveals a reduced mitochondrial membrane potential in GBM cells, but not in NHA control cells, upon pharmacological inhibition of the msiCAT-tailing pathway (n=3; unpaired Student’s t-test; ***, P < 0.001; ns, not significant).
		GSC		NHA
		DMSO	Anisomycin	DMSO	Anisomycin
	JC10 signal	1.1641	0.572139	0.413793	0.423077
		1.16393	0.517073	0.416667	0.392857
		1.06742	0.600806	0.423077	0.416667
	P.Value		0.000149521		0.50727
	Summary		***		ns
	Figure 2E
	JC-10 staining reveals an increased mitochondrial membrane potential in GBM cells, but not in control cells, upon overexpression of ATP5⍺-AT3 and ATP5⍺-AT20 (n=3; unpaired Student’s t-test; ****, P < 0.0001; ns, not significant).
		SF			NHA
		Ctrl	AT3	AT20	Ctrl	AT3	AT20
	JC10 signal	1	2	2.22222	0.5	0.52	0.45
		1.09091	2.1	2.4	0.47619	0.5	0.45
		1.13333	2.42857	2.5	0.541667	0.526316	0.5
		1.04762	2.22222	2.44444	0.52381	0.411765	0.464286
	P.Value		2.48029e-05	1.04714e-06		0.513549	0.0535071
	Summary		****	****		ns	ns
	Figure 2G
	JC-10 staining reveals an increased mitochondrial membrane potential in GBM cells, but not in NHA control cells, upon overexpression of ATP5⍺-AT3 and ATP5⍺-AT20 with concurrent genetic inhibition of the endogenous msiCAT-tailing pathway (n=3; unpaired Student’s t-test; *, P < 0.05; **, P < 0.01).
		Ctrl			sgNEMF			oeANKZF1
		Ctrl-1	AT3	AT20	Ctrl-1	AT3	AT20	Ctrl-1	AT3	AT20
	JC10 signal	1.0504	2.38727	1.67109	0.411765	1.07407	0.842105	0.628571	0.705882	0.777778
		0.835544	1.55172	1.43236	0.361111	0.945946	0.777778	0.576923	0.882353	0.681818
		1.11406	1.67109	1.67109	0.585366	0.923077	0.6	0.533333	0.72	0.75
			1.81432
	P.Value		0.0136769	0.0069637		0.00306504	0.0444064		0.0393585	0.0166788
	Summary		*	**		**	*		*	*
	Figure 2I
	Oxygen consumption rate (OCR) data indicate a reduction in mitochondrial oxygen consumption in SF268 cells expressing ATP5⍺-AT3 . Oligomycin (1.5 µM), FCCP (1.0 µM), and rotenone/antimycin A (R/A, 0.5 µM) were sequentially added.
	Time (minutes)	SF-Ctrl			SF-AT3
	1.53844	14.7528	12.8987	13.5821	11.8115	11.6934	8.7292
	8.05279	12.9335	13.7207	12.5324	11.1116	12.0921	8.67637
	14.5653	13.0648	13.9853	13.1827	11.8349	11.6286	9.04693
	21.1614	4.62163	4.30074	5.93102	4.74723	5.69119	4.09952
	27.6742	5.91391	5.58118	6.2443	5.99468	6.34063	4.31012
	34.1888	5.51389	5.28858	6.07037	5.92663	4.9054	3.81192
	40.7784	14.9178	12.9505	13.3091	9.55652	8.71069	7.32108
	47.2915	14.2597	13.8362	11.0307	9.91006	9.00598	7.63916
	53.8045	14.444	13.6853	12.8356	9.72342	8.98598	7.12855
	60.3925	4.45783	4.52378	4.90037	4.28281	4.51915	3.66266
	66.9056	4.38904	3.99937	5.24966	4.52205	4.66654	2.95271
	73.4186	4.86494	3.82721	4.81247	4.23301	4.53409	2.39797
	Figure 2J
	Statistics of mitochondrial respiration parameters in (I), including non-mitochondrial respiration, basal respiration, maximum respiration, spare respiration, proton leaks, and ATP production (n=3; unpaired Student’s t-test; *, P < 0.05; **, P < 0.01; ****, P < 0.0001; ns, not significant).
		SF-Ctrl			SF-AT3			P.Value	Summary
	Non-Mitochondrial OC	4.62733	4.54602	4.50154	4.15488	4.0471	3.72169	0.0125061	*
	Basal Respiration	9.11721	8.51619	8.90939	6.58981	6.57959	7.11512	0.00112149	**
	Maximal Respiration	9.09847	8.49618	9.15343	4.37456	4.80464	4.89096	8.93798e-05	****
	Proton Leak	0.323802	1.26711	1.12274	0.691108	1.50138	1.15963	0.601426	ns
	ATP Production	8.79341	7.24908	7.78665	5.8987	5.07821	5.9555	0.012598	*
	Spare Respiratory Capacity	0	0	0.24404	0	0	0	0.373901	ns
	Figure 2K
	Oxygen consumption rate (OCR) data indicate a reduction in mitochondrial oxygen consumption in SF268 cells expressing ATP5⍺-AT20 . Oligomycin (1.5 µM), FCCP (1.0 µM), and rotenone/antimycin A (R/A, 0.5 µM) were sequentially added.
	Time (minutes)	SF-Ctrl			SF-AT20
	1.52961	13.8083	15.5874	14.125	10.5672	11.8201	9.28161
	8.03782	13.3839	15.7722	13.182	11.8227	10.8818	9.38979
	14.5522	13.9739	15.0282	13.0218	11.3259	10.9478	9.63568
	21.1498	5.29469	7.54534	6.26449	6.71728	7.22108	5.05189
	27.6608	6.15451	7.2501	5.92421	6.13064	6.67771	4.54507
	34.1749	4.93477	6.64078	5.48137	6.18526	6.15962	4.51983
	40.7647	16.6865	14.8097	13.0307	10.2626	11.7748	9.79557
	47.2757	14.6232	15.8654	12.8401	10.1728	11.741	9.5478
	53.7885	14.8666	15.7687	11.9455	10.2066	11.1721	9.89016
	60.3765	3.03692	4.39433	5.03998	4.126	4.26954	2.38952
	66.8896	3.67767	5.46981	5.1106	4.8121	4.93787	3.26295
	73.4008	3.26843	5.01841	4.68282	4.85217	4.45474	3.16507
	Figure 2L
	Statistics of mitochondrial respiration parameters in (K), including non-mitochondrial respiration, basal respiration, maximum respiration, spare respiration, proton leaks, and ATP production (n=3; unpaired Student’s t-test; **, P < 0.01; ***, P < 0.001; ns, not significant).
		SF-Ctrl			SF-AT3			P.Value	Summary
	Non-Mitochondrial OC	4.15707	4.75269	4.32322	3.59502	4.33764	4.15732	0.252912	ns
	Basal Respiration	10.3498	9.36	9.68475	6.96128	6.36044	6.47914	0.000748409	***
	Maximal Respiration	10.6852	9.6902	9.87037	7.01597	6.14959	6.26565	0.000915858	***
	Proton Leak	2.2111	1.69024	1.36242	2.73506	1.44683	1.46425	0.808726	ns
	ATP Production	8.13874	7.66976	8.32233	4.22622	4.91361	5.01489	0.000454618	***
	Spare Respiratory Capacity	0.335412	0.330199	0.185623	0.054687	0	0	0.00712541	**
