# Supplementary material for: Mitochondrial protein carboxyl-terminal alanine-threonine tailing promotes human glioblastoma growth by regulating mitochondrial function
Source: eLife. 2026 Jan 29;13:RP99438. doi: 10.7554/eLife.99438 (PMC12854676; doi:10.7554/eLife.99438)
Supplement: Figure 3—figure supplement 1—source data 1. [file elife-99438-fig3-figsupp1-data1.xlsx]

## Sheet: Figure 3-Figure supplement 1
	Figure S5B
	MPTP activity assay shows that MPTP opening is not affected by the cycloheximide treatment (100 µg/mL) in cells. (B) Quantification of (A) (n=3; unpaired Student’s t-test; ns, not significant).
		GSC		NHA
		DMSO	Cycloheximide	DMSO	Cycloheixmide
	Calcein signal	1203.01	1361.91	125.64	106.171
		1203.63	1207.84	131.661	124.313
		1096.46	1288.94	109.55	121.712
	P.Value		0.106077		0.60429
	Summary		ns		ns
	Figure S5D
	Immunofluorescence staining shows no inhibition of endogenous ATP5⍺ protein aggregation by cycloheximide (100 µg/mL) treatment in GBM cells, using TOM20 (red) as a mitochondrial marker. Quantification of (C) (n=3; chi-squared test; ns, not significant); the total number of cells counted is indicated in the columns.
		aggregates	no aggregates	P.Value	Summary
	SF DMSO	10	35
	SF Cycloheximide	11	37	0.9362	ns
	GSC DMSO	9	30
	GSC Cycloheximide	7	26	0.8496	ns
	Figure S5E
	MPTP activity assay reveals the increased Calcein signal in GBM cells, upon overexpression of ATP5⍺-AT3 and ATP5⍺-AT20 with concurrent genetic inhibition of the msiCAT-tailing pathway (n=3; unpaired Student’s t-test; **, P < 0.01; ***, P < 0.001; ****, P < 0.0001).
		Ctrl			sgNEMF			oeANKZF1
		Ctrl-1	AT3	AT20	Ctrl-1	AT3	AT20	Ctrl-1	AT3	AT20
	Calcein signal	7.52632	12.4634	7.2421	8.40541	12.593	10.0581	8.24657	10.3699	10.88
		7.03448	11.194	7.2375	8.60274	13.3333	10.4571	8.57353	9.36	10.8056
		6.57333	11	10.8358	7.57143	12.6923	10.5542	8.36364	8.63889	10.7183
	P.Value		0.00108692	0.320416		0.000282269	0.0035038		0.106322	2.2664e-05
	Summary		**	ns		***	**		ns	****
