# Supplementary material for: Mitochondrial protein carboxyl-terminal alanine-threonine tailing promotes human glioblastoma growth by regulating mitochondrial function
Source: eLife. 2026 Jan 29;13:RP99438. doi: 10.7554/eLife.99438 (PMC12854676; doi:10.7554/eLife.99438)
Supplement: Figure 3—figure supplement 2—source data 3. [file elife-99438-fig3-figsupp2-data3.xlsx]

## Sheet: Figure 3-Figure supplement 2
	Figure S6A
	Calcium retention capacity (CRC) assay of isolated mitochondria, measured with Calcium Green-5N dye, upon cycloheximide (100 µg/mL) treatment and CAT-tailing enhancement (oeNEMF and siANKZF1).
	Time (s)	NHA	NHA+CHX	GSC	GSC+CHX	GSC+oeNEMF	GSC+siANKZF1
	0	137.5	132.5	135	130	140	145.5
	10	135	132	132	130	139	142.5
	20	133.5	132	129.5	131.5	138.5	140
	30	133.5	131	127.5	130	137.5	137.5
	40	133.5	131.5	126	128	134	137.5
	50	132	131	125	133.5	133	137.5
	60	129.5	131	123.5	126.5	132	137.5
	70	129	130.5	123	125	132	137.5
	80	127.5	130	123	125	132	137.5
	90	125.5	129.5	123	123.5	130	136
	100	124.5	129	123	124.5	130	136
	110	124.5	129	123	122	130.5	136.5
	120	124.5	127.5	124.5	120.5	130.5	136.5
	130	124.5	127	123.5	120	130.5	137
	140	123.5	127	123.5	118	130.5	137.5
	150	122	126	123	117.5	130	136.5
	160	122	126	122	117	130	136.5
	170	123.5	125.5	121	116	130.5	135.5
	180	123	126.5	121.5	116.5	130	136.5
	190	123	126.5	122.5	116	132.5	138.5
	200	195	190.5	170.5	160.5	176.5	181.5
	210	184.5	179.5	161	160.5	163.5	168.5
	220	172.5	166	152	145	155	160
	230	159.5	152.5	143	137.5	149	154
	240	151	144.5	137	130	142.5	147.5
	250	145	141.5	133.5	124.5	138.5	143.5
	260	143	136.5	130.5	125	135.5	140.5
	270	140	133.5	130	123.5	133	138
	280	138	131.5	128	121.5	132	137
	290	138	130.5	127.5	122	132.5	137.5
	300	137.5	132.5	129.5	122.5	132.5	137.5
	310	137.5	132	127	122.5	132	137.5
	320	137.5	133.5	127	124.5	132.5	139.5
	330	138.5	134.5	127.5	125	133	140
	340	140.5	136	127.5	126.5	133.5	140.5
	350	203.5	192.5	175	162.5	183.5	190.5
	360	193.5	185.5	160.5	157.5	165.5	165
	370	185.5	175	147.5	149	157	157.5
	380	178	168.5	140.5	135.5	150	148.5
	390	169.5	163	136	130	144.5	146.5
	400	160.5	156.5	133	127.5	140	143.5
	410	156	147.5	131.5	126	137.5	140.5
	420	156	145.5	132.5	126	134.5	139.5
	430	156.5	147	134.5	127.5	134.5	139.5
	440	157	145.5	135	126.5	135	140.5
	450	157.5	146	135	128	135.5	140
	460	157	145.5	136.5	128.5	135.5	140
	470	158	145.5	134	127.5	136	139.5
	480	158.5	147	135	128.5	135.5	139
	490	159.5	148.5	138.5	129	138	140
	500	231	208.5	180.5	172.5	185.5	197.5
	510	217	197.5	177.5	160	166	171
	520	197.5	186	165	151.5	155.5	160.5
	530	189	173.5	151	142	148.5	153.5
	540	184	167.5	140	133.5	145.5	150.5
	550	181.5	163.5	142.5	134.5	140.5	145.5
	560	180	160	140	132	137	142
	570	179.5	158.5	140.5	133.5	138	143
	580	179	157.5	140.5	135	138	143
	590	178.5	159	143	135	137.5	143.5
	600	178	161	140.5	133.5	137	143.5
	610	179.5	157.5	140.5	135.5	137	144.5
	620	181.5	159	142	136.5	136	144
	630	181	159.5	141	135	136.5	144
	640	179.5	163.5	145	135.5	139	146.5
	650	247.5	223.5	195.5	180.5	203.5	208.5
	660	230.5	208.5	182	178	185.5	195.5
	670	218	204.5	173.5	160.5	177	185.5
	680	212	182.5	165.5	152.5	167.5	176
	690	205.5	182.5	158	144.5	157.5	168.5
	700	197.5	166.5	150.5	141	150.5	160.5
	710	193	162.5	147.5	138.5	146.5	155
	720	191	164.5	148.5	138	144.5	152.5
	730	194	166.5	148	138	145	153
	740	189.5	167	148.5	138	145	153.5
	750	192	167	148.5	138.5	144.5	153
	760	190	167	147.5	139.5	144	153
	770	190.5	167.5	147	141	144.5	154.5
	780	191.5	169.5	147	142.5	146	152
	790	192	173	147.5	139.5	146.5	152.5
	800	266	238.5	210.5	193.5	217.5	222.5
	810	251	227	193.5	180	200	205
	820	233.5	204.5	180	171.5	190.5	195.5
	830	221.5	190.5	172.5	163.5	179.5	186
	840	215.5	183.5	162.5	155	170.5	177.5
	850	210	180.5	153.5	148.5	164.5	172.5
	860	211.5	181.5	155	146.5	159	168.5
	870	206.5	181	156	146	161	167.5
	880	207	181	155	147	162	167
	890	208.5	182.5	155.5	145.5	162.5	167.5
	900	213.5	183.5	155.5	145	162	167
	910	215	185.5	155	146.5	162	167.5
	920	215.5	186	155	147.5	162	167
	930	215	187.5	155	147.5	162.5	167.5
	940	217.5	190.5	156	148.5	164.5	170
	950	296.5	264	225.5	205	230	239
	960	275.5	260.5	206	193.5	213.5	222
	970	261	244.5	185.5	191.5	200.5	210
	980	251.5	224	170.5	173.5	187.5	200.5
	990	245.5	210.5	169.5	162.5	177.5	189.5
	1000	244.5	208.5	162.5	154.5	170	182.5
	1010	243	207.5	165	153.5	167.5	176
	1020	244	206	165	157	167	174.5
	1030	244.5	211.5	165	152.5	167	175
	1040	245.5	208	165	154	167	175
	1050	246	208.5	166.5	156	166.5	175.5
	1060	250.5	209.5	165	155.5	166	175
	1070	249	210	165.5	157.5	167.5	176.5
	1080	249.5	213.5	165.5	156	167.5	177
	1090	253	220	167.5	157	169	180
	1100	317.5	288	247.5	223.5	240.5	256
	1110	306.5	287.5	230	216	225	237.5
	1120	295.5	271.5	218.5	204.5	207.5	225
	1130	289.5	250.5	207.5	187.5	193.5	208.5
	1140	287.5	234.5	195.5	176.5	184	199
	1150	290	233.5	190.5	173	176	190.5
	1160	317.5	231.5	187.5	167.5	173	184.5
	1170	349.5	233.5	190	165.5	172.5	185.5
	1180	379.5	235.5	192	168.5	173	183.5
	1190	405.5	237.5	193.5	169	173.5	184
	1200	431.5	241	194.5	171.5	172.5	183.5
	1210	456	237	195	175.5	172	184.5
	1220	480	243.5	197.5	179	173.5	184.5
	1230	485.5	244.5	199.5	183	174.5	185.5
	1240	484	253.5	204	189.5	175.5	187
	1250	485.5	337.5	278	260	250.5	266.5
	1260	486.5	335.5	275.5	251.5	235	248.5
	1270	487	334.5	263	243.5	223.5	232
	1280	487	313.5	240.5	230.5	210	216.5
	1290	488	300.5	231.5	223	198.5	205
	1300	488.5	293.5	232.5	220	190.5	197.6
	1310	490	295.5	234	217.5	184.5	196.5
	1320	490	302.5	236	218.5	185.5	197
	1330	491	337.5	239	226.5	185.19	197.5
	1340	495	385	244	234.5	186	197
	1350	491	415.5	247	239.5	189	196
	1360	493	438.5	254	247.5	190.5	197.5
	1370	491	468	266	260	192	198
	1380	491.5	475.5	274	270	193	199.5
	1390	492	475.5	285.5	295	194.5	203.5
	1400	493	480	325.5	307	295	310
	1410	497	480.5	320	293.5	277	295.5
	1420	494	480	294.5	276.5	260	275
	1430	499	475	293.5	267.5	243.5	256.5
	1440	496	482.5	290	258.5	227.5	240
	1450	498	481.5	299	256	219	236.5
	1460	507	483	325.5	254.5	217.5	235.5
	1470	499	483	352	277	219.5	236.5
	1480	500	483.5	376.5	307.5	221	237.5
	1490	501	484	398	337	223.5	238
	1500	501.5	484.5	420.5	378.5	225.5	240.5
	1510	502	485.5	425.5	435	228	243.5
	1520	503.5	487.5	428	432.5	233	246.5
	1530	505.5	486	428.5	439.5	237	248
	1540	507.5	488	430	442.5	241.5	250.5
	1550	508	489	430.5	446	325	352.5
	1560	508.5	489	430	446	307	335.5
	1570	508.5	491.5	430.5	445	293.5	316.5
	1580	509.5	490	430.5	443.5	286	308
	1590	510	490.5	430.5	446.5	283	307
	1600	510	491	432	449	282.5	306
	1610	510	491.5	435.5	447	283	308.5
	1620	509.5	491	437	447.5	285	311.5
	1630	508.5	492	439	448.5	299	315.5
	1640	509	491.5	440.5	446.5	317.5	322.5
	1650	509	492	440.5	443	339	343
	1660	509.5	492	435	444	374.5	374.5
	1670	509.5	492	447.5	443	418	399.5
	1680	509.5	492.5	438	442.5	447	420.5
	1690	509.5	491.5	437.5	446.5	497.5	436.5
	1700	509.5	492	441	447	533	447
	1710	509	492.5	442.5	448	543.5	452.5
	1720	509.5	493	443	447.5	547.5	456.5
	1730	510	493.5	443.5	448	548	459
	1740	510.5	493.5	443.5	448.5	547.5	459
	1750	510	493	443	449	548.5	460.5
	1760	509.5	494	444.5	449	549.5	461
	1770	509.5	493.5	445	449.5	547.5	462.5
	1780	509	493	445	449	548	463.5
	1790	509	493	445.5	449	548	464.5
	1800	509	493.5	445.5	450	547.5	466
	1810	510.5	494	444	450.5	547.5	466
	1820	510	494.5	445.5	450	549	467
	1830	510	494.5	445	450	548.5	467.5
	1840	510	494	445	450	548.5	467.5
	1850	510	494.5	445	450	549	469
	Figure S6B
	Statistic of (A) shows changes in CRC in GBM cells or control cells (n=10; unpaired Student’s t-test; **, P < 0.01; ***, P < 0.001).
		NHA	NHA+CHX	GSC	GSC+CHX	GSC+ oeNEMF	GSC+ siANKZF1
	Calcium Retention Capacity (nmol Ca2+ /mg protein )	11.6667	11.6667	15	16.6667	16.6667	17.5
		13.3333	13.3333	15.8333	15	16.6667	15
		11.6667	10	15	15	17.5	15
		11.6667	11.6667	15	17.5	18.3333	16.6667
		10	14.1667	11.6667	13.3333	16.6667	15
		10	11.6667	15	15	16.6667	16.6667
		11.6667	11.6667	15	15	15	16.6667
		10	10	15	13.3333	15	16.6667
		10	13.3333	13.3333	15.8333	16.6667	15
		13.3333	11.6667	15	13.3333	16.6667	16.6667
	P.Value		0.343037		0.486155	0.000729596	0.00635785
	Summary		ns		ns	***	**
