# Supplementary material for: Mitochondrial protein carboxyl-terminal alanine-threonine tailing promotes human glioblastoma growth by regulating mitochondrial function
Source: eLife. 2026 Jan 29;13:RP99438. doi: 10.7554/eLife.99438 (PMC12854676; doi:10.7554/eLife.99438)
Supplement: Figure 3—source data 3. [file elife-99438-fig3-data3.xlsx]

## Sheet: Figure 3
	Figure 3B
	MPTP activity assay shows reduced mitochondrial permeability transition pore opening in GSC cells compared to NHA (control) cells. Pharmacological (anisomycin 200 nM) inhibition of CAT-tailing reverse it. Quantification of A (n=3; unpaired Student’s t-test; ****, P < 0.0001; ns, not significant).
		GSC		NHA
		DMSO	Anisomycin	DMSO	Anisomycin
	Calcein signal	560.99	129.413	105.968	118.175
		602.853	138.407	110.944	95.231
		585.43	122.124	118.955	95.7406
	P.Value		4.07109e-06		0.351705
	Summary		****		ns
	Figure 3D
	MPTP activity assay shows reduced mitochondrial permeability transition pore opening in GSC cells compared to NHA (control) cells. Genetic (sgNEMF) inhibition of CAT-tailing reverse it. Quantification of C (n=3; unpaired Student’s t-test; ****, P < 0.0001; ns, not significant).
		GSC		NHA
		Ctrl	sgNEMF	Ctrl	sgNEMF
	Calcein signal	884.717	216.35	107.95	109.846
		967.833	216.069	117.641	95.679
		897.553	266.365	115.049	134.147
	P.Value		2.42802e-05		0.979132
	Summary		****		ns
	Figure 3F
	Immunofluorescence staining shows that anisomycin treatment inhibit endogenous ATP5⍺ protein aggregation in GBM cells, using TOM20 (red) as a mitochondrial marker. Quantification of E (n=3; chi-squared test; *, P < 0.05; **, P < 0.01); the total number of cells counted is indicated in the columns.
		aggregates	no aggregates	P.Value	Summary
	SF DMSO	25	74
	SF Anisomycin	11	88	0.0099	**
	GSC DMSO	43	56
	GSC Anisomycin	27	72	0.0174	*
	Figure 3H
	Immunofluorescence staining shows that sgNEMF inhibit endogenous ATP5⍺ protein aggregation in GBM cells, using TOM20 (red) as a mitochondrial marker. Quantification of G (n=3; chi-squared test; *, P < 0.05; ***, P < 0.001); the total number of cells counted is indicated in the columns.
		aggregates	no aggregates	P.Value	Summary
	SF DMSO	10	40
	SF Anisomycin	0	50	0.0009	***
	GSC DMSO	7	27
	GSC Anisomycin	1	35	0.0192	*
	Figure 3I
	Calcium retention capacity (CRC) assay of isolated mitochondria, measured with Calcium Green-5N dye, shows high CRC in GBM cells compared to control NHA cells. CsA (Cyclosporin A, MPTP inhibitor) serves as a positive control.
	Time (s)	NHA	NHA+CsA	GSC	GSC+ Aniso	GSC+ sgNEMF
	0	148.5	150	152	156.5	154.5
	10	146	148.5	150.5	151.5	147.5
	20	144.5	147	149.5	150.5	144.5
	30	144	145.5	147	150	140
	40	143.5	144	146	149.5	134.5
	50	142	142.5	145	148	130
	60	140.5	142.5	143.5	146.5	130.5
	70	140	144	143.5	144	130.5
	80	138.5	142.5	143.5	144	131
	90	136	142.5	143.5	145	131.5
	100	135	142.5	143.5	145	132
	110	135	142.5	143.5	145	132.5
	120	135	142.5	143.5	146	133.5
	130	135.5	142.5	143.5	144	133.5
	140	134.5	142.5	143.5	146	135.5
	150	133	142	143.5	144	134.5
	160	133	142	143	147	134.5
	170	133.5	141.5	143.5	143	134
	180	133.5	142.5	143.5	145.5	134
	190	133.5	142.5	144.5	147	136
	200	203	183	194.5	200.5	195.5
	210	191.5	174	185.5	188.5	174.5
	220	180.5	167	173.5	180	163
	230	170.5	160.5	164.5	168.5	149
	240	162	154.5	157	160.5	142
	250	156.5	150	154	153.5	140.5
	260	154	147	152.5	150.5	138.5
	270	151	144	150	147.5	133.5
	280	149.5	142.5	149.5	146	133.5
	290	149	142.5	149.5	146.5	133.5
	300	148.5	142.5	149.5	145.5	133.5
	310	148.5	141	149.5	145	132
	320	148	142.5	149.5	146.5	130.5
	330	149	142.5	149.5	151	131.5
	340	150.5	142.5	151	153.5	133
	350	214.5	184.5	204.5	210	200.5
	360	204.5	172.5	194.5	204	193
	370	196.5	166.5	186.5	195	185
	380	189	160.5	179.5	188	180
	390	180.5	153	170	181.5	171
	400	171.5	148.5	163.5	172.5	162.5
	410	167	144	158.5	169.5	152
	420	167	142.5	157	168	153
	430	167.5	142.5	157.5	168	151.5
	440	168	142.5	158	167.5	151.5
	450	168	143	158	168	152
	460	168	142.5	158	169	153
	470	169	141.5	158	170.5	150.5
	480	169.5	141.5	158.5	166	153.5
	490	170.5	141.5	158.5	170	152
	500	238	180	208.5	215.5	205
	510	225	170.5	197	210.5	197.5
	520	206	162	186.5	202.5	193.5
	530	200	156	171	188	179
	540	195	150	165.5	178.5	173.5
	550	192.5	142.5	162.5	172.5	167.5
	560	191	143.5	160.5	173	165.5
	570	190.5	142.5	160.5	172.5	165
	580	190	141.5	160.5	173.5	167
	590	189.5	141	160.5	172.5	166.5
	600	189.5	141	160.5	171	165
	610	190.5	141.5	160.5	174.5	165
	620	191	142	161	173	166
	630	192	142.5	161	173	165.5
	640	190.5	142.5	160.5	173.5	167.5
	650	255.5	187.5	213.5	240	225
	660	240.5	178.5	204.5	237.5	217.5
	670	229	169.5	195.5	230	210
	680	221	162	188	220	200
	690	212.5	154.5	180.5	210	190
	700	208.5	148.5	174.5	200.5	180.5
	710	204	145.5	171.5	193.5	173.5
	720	202	142.5	168.5	188.5	170
	730	200	142	168	187.5	170
	740	200.5	142.5	168.5	188	170.5
	750	201	143.5	168	188.5	170
	760	201	141	167.5	186	172
	770	201.5	141.5	167	185.5	172
	780	202.5	142	167	185	172.5
	790	203	143	169	185.5	174
	800	265.5	190.5	219.5	237	227
	810	252	180.5	209	233.5	223
	820	243	173	200	227	218
	830	232.5	161.5	190.5	223.5	210.5
	840	226.5	154.5	183	215	202.5
	850	221	148	177.5	206	196
	860	218.5	146	175	199.5	195
	870	217.5	143.5	175	199	195.5
	880	218	141	175	198.5	195
	890	219.5	143.5	175	198.5	194.5
	900	219	141	175.5	199.5	194
	910	220	141.5	175	197.5	196
	920	220.5	142	175	197.5	195
	930	221	141.5	175	199.5	196.5
	940	222.5	143.5	177.5	202	198
	950	285	193	226.5	260	240.5
	960	272	180.5	214	255.5	237.5
	970	262	170.5	204	247.5	229
	980	258	160	193.5	236.5	220.5
	990	256.5	153.5	189.5	226.5	215.5
	1000	255.5	148	186	218	213.5
	1010	254	145.5	185.5	217	210.5
	1020	255	143.5	185	216	210.5
	1030	255.5	142	185	216	211
	1040	256.5	143	185	218	211
	1050	257	142	185	219	211.5
	1060	258	143.5	185	221.5	210
	1070	259	143.5	185.5	223.5	210.5
	1080	260.5	143.5	185.5	225	210.5
	1090	262	144.5	185.5	226.5	213.5
	1100	315	196.5	251.5	300	277.5
	1110	310	180	241.5	294.5	270.5
	1120	306.5	170.5	233.5	287.5	263.5
	1130	300.5	159.5	225	279.5	258
	1140	298.5	151.5	216.5	271	255
	1150	301	149	210.5	264.5	253.5
	1160	339.5	144	210	263	253
	1170	364.5	142.5	210	262.5	253.5
	1180	398	140.5	212	262.5	252
	1190	420.5	143	213.5	263	252
	1200	442.5	144	214.5	263.5	252
	1210	465	145.5	215	264	254.5
	1220	486	147.5	216	265	255
	1230	492.5	148.5	218	266.5	256
	1240	495	149.5	220.5	268	257
	1250	496.5	195	278	336.5	324.5
	1260	497.5	178.5	276.5	329	322.5
	1270	498	167.5	268.5	324.5	317.5
	1280	498	161	260	320.5	312.5
	1290	499	154.5	251.5	316.5	308
	1300	499.5	150	252.5	313.5	303
	1310	501	148.5	254	313	302
	1320	497	148.5	256	312.5	300.5
	1330	502	147.5	259	312	306.6
	1340	502	147.5	264	313	335
	1350	502	147	267	313.5	361.5
	1360	502	148	274	315.5	392.5
	1370	502	148.5	286	329	415
	1380	502.5	149	294	345.5	441.5
	1390	503	151	305.5	360	476.5
	1400	504	195.5	336.5	380.5	510
	1410	504	179.5	322.5	420.5	555.5
	1420	505	170.5	309.5	456.5	578.5
	1430	505.5	163.5	308.5	498	592.5
	1440	504	156	310	557	596.5
	1450		152	319	597.5	600
	1460		147	345.5	609.5	601
	1470		149	372	614.5	602
	1480		147.5	396.5	620.5	602
	1490		147.5	418	620.5	603
	1500		147	440.5	620.5	603
	1510		147.5	445.5	620.5	603
	1520		148.5	448	618.5	603.5
	1530		151.5	448.5	622	603
	1540		160.5	450	620	604
	1550		227.5	450.5	620	605
	1560		287.5	450	620	606.5
	1570		336	450.5	620	606
	1580		395.5	450.5	620	607
	1590		464.5	450.5	620.5	607
	1600		522.5	451	619	608
	1610		575.5	450.5	619.5	608
	1620		665.5	450.5	620.5	608
	1630		677.5	451	620.5	609
	1640		680.5	450.5	620	610
	1650		683	451	620.5	611.5
	1660		683.5	451	620	613.5
	1670		684	452	620.5	615
	1680		685	453	620.5	615.5
	1690		685.5	453.5	620	617
	1700		686	455	618	620
	Figure 3J
	Statistic of (I) shows attenuated CRC in mitochondria pretreated with anisomycin or with sgNEMF (n=10; unpaired Student’s t-test; ***, P < 0.001; ****, P < 0.0001).
		NHA	NHA+CsA	GSC	GSC+ Aniso	GSC+ sgNEMF
	Calcium Retention Capacity (nmol Ca2+ /mg protein )	11.6667	15	13.3333	11.6667	11.6667
		11.6667	15	15	10	10
		13.3333	15	15	10	10
		13.3333	15	13.3333	10	13.3333
		8.33333	15	15	13.3333	10
		10	15	11.6667	10	13.3333
		11.6667	15	15	13.3333	8.33333
		10	15	15	11.6667	13.3333
		11.6667	15	13.3333	8.33333	11.6667
		8.33333	15	15	10	11.6667
	P.Value		1.38484e-06	0.000190739	5.28049e-05	0.000435927
	Summary		****	***	****	***
	Figure 3L
	MPTP activity assay shows that ectopic expression of ATP5⍺-AT3 and ATP5⍺-AT20 inhibits MPTP opening in GBM cells. Quantification of (K) (n=3; unpaired Student’s t-test; ****, P < 0.0001).
		SF-Ctrl	SF-AT3	SF-AT20
	Calcein signal	230.244	572.104	450.527
		246.847	610.576	467.779
		210.627	593.066	439.197
	P.Value		1.86467e-05	7.52509e-05
	Summary		****	****
