# Supplementary material for: Mitochondrial protein carboxyl-terminal alanine-threonine tailing promotes human glioblastoma growth by regulating mitochondrial function
Source: eLife. 2026 Jan 29;13:RP99438. doi: 10.7554/eLife.99438 (PMC12854676; doi:10.7554/eLife.99438)
Supplement: Figure 4—figure supplement 1—source data 1. [file elife-99438-fig4-figsupp1-data1.xlsx]

## Sheet: Figure 4-Figure supplement 1
	Figure S7A
	MTT assay indicates no significant change in GBM proliferation upon ATP5⍺-GS3 and ATP5⍺-GS20 expression (n=3; unpaired Student’s t-test; **, P < 0. 01; ns, not significant).
		Day 0				Day 4
		Ctrl	ATP5⍺	GS3	GS20	Ctrl	ATP5⍺	GS3	GS20
	Cell viability	102.259	98.0086	92.6886	88.3598	268	249.366	273.073	281.662
		100.348	95.3739	88.8495	90.4762	270	262.945	267.847	281.662
		97.4808	103.805	107.497	110.582	285	255.538	258.701	269.816
		102.259	104.332	112.981	112.169	276	253.069	267.847	263.235
	P.Value						0.00643326	0.154952	0.91583
	Summary						**	ns	ns
	Figure S7C
	Wound healing assay reveals promoted GBM migration upon ATP5⍺-AT3 and ATP5⍺-AT20 expression. (C) Quantification of (B) shows an increased healing rate, indicated by scratch wound coverage at both 24 and 48 hours (n=3; unpaired Student’s t-test; **, P < 0.01).
		0 hr			24 hr			48 hr
		SF-Ctrl	SF-AT3	SF-AT20	SF-Ctrl	SF-AT3	SF-AT20	SF-Ctrl	SF-AT3	SF-AT20
	Wound coverage	0	0	0	14.3775	27.1193	22.4876	76.1015	85.3302	84.0092
		0	0	0	13.0127	25.2656	26.8644	72.9047	86.7199	80.4782
		0	0	0	9.19414	22.2585	26.6482	72.6105	88.9377	80.7739
	P.Value					0.00378973	0.00336303		0.00102493	0.00772591
	Summary					**	**		**	**
	Figure S7E
	Transwell assay reveals no significant alteration in GBM migration upon ATP5⍺-GS3 and ATP5⍺-GS20 expression. (E) Quantification of (D) shows the number of migrated cells (n=3; unpaired Student’s t-test; ns, not significant).
		Ctrl	ATP5⍺	GS3	GS20
	Cell migration	98.1731	100.913	97.6077	98.0426
		102.697	96.4332	99.2605	93.084
		99.1301	97.0857	94.3889	90.3871
	P.Value		0.397629	0.215984	0.0791712
	Summary		ns	ns	ns
	Figure S7F
	qRT-PCR shows no increase in mRNA levels of mitochondrial unfolded protein response genes, using ACTB as the control to normalize the ΔΔCt (n=3; unpaired Student’s t-test; ns, not significant; **, P < 0.01).
		SF-Ctrl (2^ΔΔCt)			SF-AT3 (2^ΔΔCt)			P.Value	Summary	SF-AT20 (2^ΔΔCt)			P.Value	Summary
	LONP1	1	1	1	0.812252	0.933033	1.12506	0.684459	ns	1.1487	0.806642	1.1487	0.435888	ns
	mtHSP70	1	1	1	0.959264	0.76313	1.06437	0.19356	ns	0.965936	0.632878	0.986233	0.108083	ns
	HSP60	1	1	1	0.907519	0.752623	0.952638	0.05145	ns	0.619854	0.835088	0.76313	0.00285931	**
