# Supplementary material for: Mitochondrial protein carboxyl-terminal alanine-threonine tailing promotes human glioblastoma growth by regulating mitochondrial function
Source: eLife. 2026 Jan 29;13:RP99438. doi: 10.7554/eLife.99438 (PMC12854676; doi:10.7554/eLife.99438)
Supplement: Figure 4—figure supplement 2—source data 3. [file elife-99438-fig4-figsupp2-data3.xlsx]

## Sheet: Figure 4-Figure supplement 2
	Figure S8B
	TUNEL staining shows that GBM cells are more resistant to staurosporine (STS, 1 µM)-induced apoptosis compared to control cells, using TUNEL-Cy3 as an apoptotic cell indicator and DAPI as a nucleus indicator. (B) Quantification of A shows the percentage of TUNEL-positive cells in the population (n=3; unpaired Student’s t-test; ***, P < 0.0001; ****, P < 0.0001), using DMSO as the vehicle control.
		DMSO				STS
		SVG	NHA	SF	GSC	SVG	NHA	SF	GSC
	TUNEL positive	0	0	0	0	80	90	42	55
		0	0	0	0	86	94	45	50
		0	0	0	0	84	92	40	52
	P.Value							5.67264e-05	0.00017094
	Summary							****	***
	Figure S8E
	Flow cytometry analysis using Annexin V-FITC/Propidium Iodide (PI) staining shows alterations in apoptosis rates in GBM cells upon ATP5⍺-AT3, ATP5⍺-AT20 expression. The apoptotic cell population (Annexin V positive, PI negative) is represented in the fourth quadrant (right lower). Quantification of (D) shows the percentages of apoptotic cells (n=3; unpaired Student’s t-test; **, P < 0.001; ***, P…
		Ctrl	AT3	AT20
	Apoptotic cell	4.99	2.78	4.02
		5.03	2.25	3.99
		5.33	2.14	3.57
	P.Value		0.000265179	0.00224109
	Summary		***	**
	Figure S8G
	Flow cytometry analysis using Annexin V-FITC/Propidium Iodide (PI) staining shows alterations in apoptosis rates in GBM cells upon ATP5⍺-GS3, ATP5⍺-GS20 expression. The apoptotic cell population (Annexin V positive, PI negative) is represented in the fourth quadrant (right lower). Quantification of (F) shows the percentages of apoptotic cells (n=3; unpaired Student’s t-test; ns, not significant).
		Ctrl	ATP5⍺	AT3	AT20
	Apoptotic cell	6.5	5.82	6.58	6.5
		6.2	5.94	6.31	6.52
		5.9	5.19	6.43	6.33
	P.Value		0.130758	0.275144	0.244512
	Summary		ns	ns	ns
