# Supplementary material for: Mitochondrial protein carboxyl-terminal alanine-threonine tailing promotes human glioblastoma growth by regulating mitochondrial function
Source: eLife. 2026 Jan 29;13:RP99438. doi: 10.7554/eLife.99438 (PMC12854676; doi:10.7554/eLife.99438)
Supplement: Figure 4—source data 1. [file elife-99438-fig4-data1.xlsx]

## Sheet: Figure 4
	Figure 4A
	MTT assay indicates increased proliferation caused by ATP5⍺-AT3 and ATP5⍺-AT20 expression in GBM cells (n=3; unpaired Student’s t-test; **, P < 0.01; ***, P < 0.001).
		Day 0			Day 4
		SF-Ctrl	SF-AT3	SF-AT20	SF-Ctrl	SF-AT3	SF-AT20
	Cell viability	100	100	100	608	960	920
		100	100	100	640	1080	920
		100	100	100	664	880	880
	P.Value					0.00509522	0.000212938
	Summary					**	***
	Figure 4B
	MTT assay indicates no change in proliferation caused by ATP5⍺-AT3 and ATP5⍺-AT20 expression in NHA cells (n=3; unpaired Student’s t-test; ns, not significant).
		Day 0			Day 4
		NHA-Ctrl	NHA-AT3	NHA-AT20	NHA-Ctrl	NHA-AT3	NHA-AT20
	Cell viability	100	100	100	656.702	740.562	648.591
		100	100	100	724.397	773.467	621.634
		100	100	100	637.388	862.597	663.907
	P.Value					0.0568015	0.389076
	Summary					ns	ns
	Figure 4D
	Transwell assay reveals enhanced migration induced by ATP5⍺-AT3 and ATP5⍺-AT20 expression in GBM (SF) cells but not in control (NHA) cells. Quantification of (C) shows the number of migrated cells (n=3; unpaired Student’s t-test; ***, P < 0.001; ns, not significant).
		SF-Ctrl	SF-AT3	SF-AT20	NHA-Ctrl	NHA-AT3	NHA-AT20
	Cell migration	101.871	147.755	138.05	64.3046	64.9648	72.7553
		94.5422	158.649	143.266	67.8037	68.1998	65.625
		103.587	157.064	148.283	60.4753	64.5026	64.8988
	P.Value		0.000241394	0.00043845		0.521522	0.338239
	Summary		***	***		ns	ns
	Figure 4E
	MTT assay indicates an increased proliferation in GBM cells, upon overexpression of ATP5⍺-AT3 and ATP5-AT20 with concurrent genetic inhibition of the endogenous msiCAT-tailing pathway (n=3; unpaired Student’s t-test; *, P < 0.05; **, P < 0.01; ***, P < 0.001).
		Ctrl			sgNEMF			oeANKZF1
		Ctrl-1	AT3	AT20	Ctrl-1	AT3	AT20	Ctrl-1	AT3	AT20
	Cell viability	97.3995	122.146	111.415	65.2968	86.758	82.4201	65.2968	88.8128	96.5753
		98.1088	126.256	119.178	60.0457	90.6393	90.1826	70.3196	97.7169	94.9772
		104.492	110.046	121.918	65.9817	92.0091	89.726	69.4064	97.4886	101.37
	P.Value		0.0220992	0.0106359		0.000442504	0.00165301		0.00135697	0.000286845
	Summary		*	*		***	**		**	***
	Figure 4G
	Transwell assay reveals enhanced migration upon overexpression of ATP5⍺-AT3 and ATP5⍺-AT20 with concurrent genetic inhibition of the endogenous msiCAT-tailing pathway. Quantification of (F) shows the number of migrated cells (n=3; unpaired Student’s t-test; ***, P < 0.001; ****, P < 0.0001).
		Ctrl			sgNEMF			oeANKZF1
		Ctrl-1	AT3	AT20	Ctrl-1	AT3	AT20	Ctrl-1	AT3	AT20
	Cell migration	89.673	223.408	234.079	36.1446	109.811	90.7057	49.7418	134.768	107.573
		109.294	193.976	239.931	45.9552	122.547	104.991	53.3563	142.857	117.384
		101.033	215.49	245.955	49.3976	111.876	101.377	44.2341	125.473	106.54
	P.Value		0.000449104	2.99395e-05		0.000223669	0.000701014		0.000114759	0.000147106
	Summary		***	****		***	***		***	***
	Figure 4I
	TUNEL staining shows that staurosporine (STS, 1 µM)-induced apoptosis is attenuated by ATP5⍺-AT3 and ATP5⍺-AT20 expression in GBM cells, using TUNEL-Cy3 as an apoptotic cell indicator and DAPI as a nucleus indicator. (I) Quantification of (H) shows the percentage of TUNEL-positive cells in the population (n=3; unpaired student’s t-test; ***, P < 0.001), using DMSO as the vehicle control.
		DMSO			STS
		SF-Ctrl	SF-AT3	SF-AT20	SF-Ctrl	SF-AT3	SF-AT20
	TUNEL positive	0	0	0	40	10	9
		0	0	0	45	12	12
		0	0	0	39	14	10
	P.Value					0.00017834	0.000112505
	Summary					***	***
	Figure 4J
	MTT assay indicates an enhanced resistance to temozolomide (TMZ, 150 µM) induced by ATP5⍺-AT3 and ATP5⍺-AT20 expression. The TMZ-treated/SF-Ctrl group is used as the control (n=3; unpaired Student’s t-test; ***, P < 0.001).
		DMSO			TMZ
		SF-Ctrl	SF-AT3	SF-AT20	SF-Ctrl	SF-AT3	SF-AT20
	Cell viability	98	98	98	52.8	68.7	66
		100	100	100	52	66	64
		102	102	102	54	70	68
	P.Value					0.000310597	0.000539117
	Summary					***	***
