# Supplementary material for: Mitochondrial protein carboxyl-terminal alanine-threonine tailing promotes human glioblastoma growth by regulating mitochondrial function
Source: eLife. 2026 Jan 29;13:RP99438. doi: 10.7554/eLife.99438 (PMC12854676; doi:10.7554/eLife.99438)
Supplement: Figure 5—figure supplement 1—source data 3. [file elife-99438-fig5-figsupp1-data3.xlsx]

## Sheet: Figure 5-Figure supplement 1
	Figure S9A
	Caspase-3/7 activity assay shows increased apoptosis in GBM cells caused by anisomycin treatment (n=3; unpaired Student’s t-test; ***, P < 0.001; ****, P <0.0001; compared to the control group (DMSO) at the corresponding time).
	Time (min)	GSC-DMSO	GSC-CHX	P.Value	Summary	GSC-ANS	P.Value	Summary
	0	0.991304	1.06957	0.0667665	ns	1.04348	0.0157998	*
		0.991304	1.01739			1.09565
		1.01739	1.04348			1.09565
	30	1.06957	1.14783	0.0912602	ns	1.4087	2.76796e-05	****
		1.04348	1.14783			1.43478
		1.06957	1.06957			1.46087
	90	1.30435	1.38261	0.070484	ns	1.5913	0.000101129	***
		1.33044	1.4087			1.5913
		1.35652	1.35652			1.61739
	180	1.51304	1.53913	0.0993007	ns	1.93043	6.0151e-05	****
		1.53913	1.64348			2.0087
		1.53913	1.61739			1.95652
	Figure S9E
	Flow cytometry analysis using Annexin V-FITC/Propidium Iodide (PI) staining shows alterations in apoptosis rates in GBM cells upon genetic (D) and pharmacological (F) inhibition of the msiCAT-tailing pathway. The apoptotic cell population (Annexin V positive, PI negative) is represented in the fourth quadrant (right lower). (E, G) Quantification of (D, F) shows the percentages of apoptotic cells …
		DMSO	ANS	CHX
	Apoptotic cell	6.51	8.7	6.17
		6.57	8.64	6.85
		6.94	8.71	6.74
	P.Value		0.000122782	0.746289
	Summary		***	ns
	Figure S9G
	Flow cytometry analysis using Annexin V-FITC/Propidium Iodide (PI) staining shows alterations in apoptosis rates in GBM cells upon genetic (D) and pharmacological (F) inhibition of the msiCAT-tailing pathway. The apoptotic cell population (Annexin V positive, PI negative) is represented in the fourth quadrant (right lower). (E, G) Quantification of (D, F) shows the percentages of apoptotic cells …
		Ctrl-sg	sgNEMF	Ctrl-oe	oeANKZF1
	Apoptotic cell	15.89	26.15	3.57	4.12
		15.34	25.74	3.64	4.51
		15.75	25.71	3.67	4.49
	P.Value		1.23723e-06		0.00458112
	Summary		****		**
