# Supplementary material for: Mitochondrial protein carboxyl-terminal alanine-threonine tailing promotes human glioblastoma growth by regulating mitochondrial function
Source: eLife. 2026 Jan 29;13:RP99438. doi: 10.7554/eLife.99438 (PMC12854676; doi:10.7554/eLife.99438)
Supplement: Figure 5—source data 1. [file elife-99438-fig5-data1.xlsx]

## Sheet: Figure 5
	Figure 5A
	Cell viability assay shows greater sensitivity to anisomycin treatment in patient-derived GSC cells than control NSC cells at 48 hours (n=3; unpaired Student’s t-test; **, P < 0.01; ****, P <0.0001; compared to controls at the corresponding dose).
	[Aniomycine] - uM	NSC	GSC22	P.Value	Summary	GSC107	P.Value	Summary
	0	97.541	88.5237	0.475407	ns	88.2508	0.999999	ns
		103.783	111.476			102.555
		98.6759	126.38			109.194
	5	57.8184	29.2026	0.00300625	**	17.5975	0.00116145	**
		63.6822	26.4547			17.8346
		77.4905	29.3642			18.5458
	10	57.251	25.3233	0.00476739	**	17.7555	0.00139317	**
		45.5233	24.3534			15.6217
		61.6015	29.2026			16.333
	20	50.6305	25.6466	7.09767e-06	****	15.0685	5.04725e-06	****
		51.7654	24.8384			16.491
		49.3064	24.0302			17.6765
	Figure 5B
	MTT assay indicates reduced GBM cell proliferation by genetic inhibition of the msiCAT-tailing pathway (n=3; unpaired Student’s t-test; **, P < 0.01; ***, P < 0.001; ****, P <0.0001, compared to controls at the corresponding time).
	Time (Day)	SF-Ctrl	SF-sgNEMF	P.Value	Summary	SF_oeANKZF1	P.Value	Summary
	0	106.098	86.5854	0.0264445	*	80.0805	0.893543	ns
		92.6829	79.2683			98.7805
		101.219	86.5854			127.237
	1	276.422	99.1878	1.19379e-05	****	110.568	1.33074e-05	****
		263.007	87.8049			115.446
		260.568	84.5537			103.251
	2	438.212	173.983	8.48315e-07	****	229.268	2.58706e-07	****
		440.651	156.91			220.324
		435.773	169.105			221.951
	3	523.983	297.154	0.000760874	***	365.041	0.00286207	***
		521.544	299.593			382.115
		603.251	273.983			356.098
	Figure 5C
	MTT assay indicates reduced NHA cell proliferation by genetic inhibition of the msiCAT-tailing pathway (n=3; unpaired Student’s t-test; **, P < 0.01; ****, P <0.0001, compared to controls at the corresponding time).
	Time (Day)	NHA-Ctrl	NHA-sgNEMF	P.Value	Summary	NHA_oeANKZF1	P.Value	Summary
	0	102.47	287.656	0.873911	ns	359.259	0.776692	ns
		97.5296	3.7037			19.7519
		100	53.0852			23.4556
	1	253.085	18.5185	4.27966e-07	****	64.1963	1.35908e-05	****
		244.444	22.2222			43.2111
		245.678	27.1593			41.9741
	2	480.248	38.2704	1.62667e-08	****	93.2111	8.4132e-07	****
		476.544	33.3333			70.3704
		486.418	35.8037			72.8407
	3	862.963	153.704	7.3027e-05	****	548.148	0.00192739	**
		846.296	62.963			514.815
		755.556	96.2963			451.852
	Figure 5E
	Transwell assay reveals that both genetic (D) and pharmacological (F) inhibition of the msiCAT-tailing pathway hampers the migration of GBM cells but not control cells. (E, G) Quantification of (D, F) showing the number of migrated cells (n=3; unpaired Student’s t-test; ***, P < 0.001; ****, P <0.0001; ns, not significant).
		SF-Ctrl	SF-sgNEMF	SF-oeANKZF1	NHA-Ctrl	NHA-sgNEMF	NHA-oeANKZF1
	Cell migration	103.982	56.9938	60.5201	45.313	43.4176	41.3018
		100.411	47.9577	62.5918	42.6242	40.5965	45.9741
		95.6068	52.7623	58.9333	45.5774	43.9465	43.1972
	P.Value		0.000184278	0.000119704		0.257734	0.572726
	Summary		***	***		ns	ns
	Figure 5G
	Transwell assay reveals that both genetic (D) and pharmacological (F) inhibition of the msiCAT-tailing pathway hampers the migration of GBM cells but not control cells. (E, G) Quantification of (D, F) showing the number of migrated cells (n=3; unpaired Student’s t-test; ***, P < 0.001; ****, P <0.0001; ns, not significant).
		GSC-DMSO	GSC-ANS	NHA-DMSO	NHA-ANS
	Cell migration	99.138	57.5929	64.0332	60.6019
		101.777	54.8479	59.5989	57.7513
		99.0852	51.9973	57.9624	53.9505
	P.Value		1.64471e-05		0.306776
	Summary		****		ns
	Figure 5I
	TUNEL staining shows that both genetic (H) and pharmacological (J) inhibition of the msiCAT-tailing pathway enhances STS-induced apoptosis in GBM cells, using TUNEL-Cy3 as an apoptotic cell indicator and DAPI as a nucleus indicator. (I, K) Quantification of (H, J) showing the percentage of TUNEL-positive cells in the population (n=3; unpaired Student’s t-test; **** P < 0.0001), using DMSO as the …
		DMSO			STS
		SF-Ctrl	SF-sgNEMF	SF-oeANKZF1	SF-Ctrl	SF-sgNEMF	SF-oeANKZF1
	TUNEL positive	0	0	0	42	82	87
		0	0	0	41	84	82
		0	0	0	38	85	83
	P.Value					8.33718e-06	2.32439e-05
	Summary					****	****
	Figure 5K
	TUNEL staining shows that both genetic (H) and pharmacological (J) inhibition of the msiCAT-tailing pathway enhances STS-induced apoptosis in GBM cells, using TUNEL-Cy3 as an apoptotic cell indicator and DAPI as a nucleus indicator. (I, K) Quantification of (H, J) showing the percentage of TUNEL-positive cells in the population (n=3; unpaired Student’s t-test; **** P < 0.0001), using DMSO as the …
		DMSO		STS
		GSC-DMSO	GSC-ANS	GSC-DMSO	GSC-ANS
	TUNEL positive	0	0	20	80
		0	0	22	84
		0	0	24	81
	P.Value				3.63382e-06
	Summary				****
	Figure 5L
	MTT assay shows that pharmacological inhibition of the msiCAT-tailing pathway decrease the resistance of GBM cells to temozolomide (TMZ, 150 µM) treatment (n=3; unpaired Student’s t-test; * P < 0.05; **, P < 0.01).
		SF				GSC
		DMSO	ANS	TMZ	ANS+TMZ	DMSO	ANS	TMZ	ANS+TMZ
	Cell viability	97.2603	98.4931	73.5616	25.7534	111.966	83.7607	60.6838	27.3504
		93.9726	103.014	74.3836	47.9452	96.5812	94.0171	60.6838	35.0427
		108.767	94.7945	78.0822	45.0685	91.453	96.5812	70.9402	45.2991
	P.Value				0.00732176				0.010554
	Summary				**				*
	Figure 5N
	Neurosphere formation assay shows that reduced spheroid formation caused by pharmacological inhibition of the msiCAT-tailing pathway can synergize with TMZ in GBM cells. (N) Quantification of (M) (n=3; unpaired Student’s t-test; **, P < 0.01).
		DMSO		TMZ
		DMSO	ANS	DMSO	ANS
	Sphere size	99.2125	110.937	84.1147	51.6747
		106.93	117.411	93.2617	56.7918
		93.857	96.4057	91.3059	63.1322
	P.Value		0.320255		0.00170753
	Summary		ns		**
