# Supplementary figures and images for: Mitochondrial protein carboxyl-terminal alanine-threonine tailing promotes human glioblastoma growth by regulating mitochondrial function
Source: eLife journal article supplement (doi:10.7554/elife.99438), 2024-09-02

Figure 3M

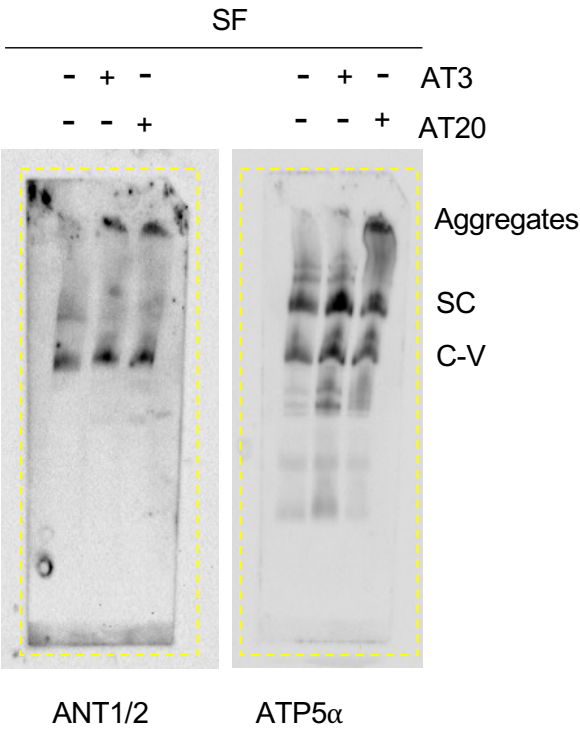

Figure 3, source data 1  
Original membranes corresponding to Figure 3M.

Supplement: fig3-data1 [file Figure 3-source data 1.pdf › Figure 3-source data 1.pdf]
